# Supplementary material
Source: MDPI journal article supplement (https://www.mdpi.com/2073-445X/11/12/2151)
Supplement: s1 [file s1]

Archive with 2 entries (2 files):
- FMS-DataClean9-6-12.xlsx
- land-1891121-supplementary.pdf
