# Supplementary material
Source: MDPI journal article supplement (https://www.mdpi.com/2073-445X/11/12/2151)
Supplement: s1 [file s1 › FMS-DataClean9-6-12.xlsx]

## Sheet: ReadMe
Title
FMS_LMS_Master_Data
Overview
This workbook includes five worksheets in addition to this worksheet, and each worksheet is labeled with a title describing the contents of the respective sheet.
Worksheets
ReadMe - general description of the workbook
Master_LMS_FMS_Dataset - data from two mail surveys described in the abstract combined on one sheet
Column Codes and Metadata - description of column headings in the "Master_LMS_FMS_Dataset" sheet
Lookup Tables - lookup tables as referenced in the "Column Codes and Metadata" sheet
LMS_OpenEnded - Open ended responses from the LMS survey
FMS_OpenEnded - Open ended responses from the FMS survey
Abstract
This data set includes responses from two mail surveys conducted in the Fall and Winter of 2009 and 2010. The two surveys are refered to as the Land Management Survey and the Forest Management Survey, LMS and FMS, respectively. The sampling frame for both surveys were non-industrial private parcels in two wildland urban interface study areas in Linn and Lane Counties, Oregon. Parcels were include…
For More Information
Please contact Max Nielsen-Pincus, Insitute for a Sustainable Environment, University of Oregon
maxn@uoregon.edu
541-346-0676
Date
2010-05-02

## Sheet: Master_LMS_FMS_DataSet
ID	SurveyID	EnteredBy	DateEntered	Survey	Sample	JF	County	Agent Category	WF2	WF3a	WF3b	WF3c	WF3d	WF4a	WF4b	WF4c	WF4d	WF4e	Dem9a	DEM9b	DEM9c	ForMix6	ForMix7	ForMixOW1a	ForMixOW1b	ForMixOW1c	ForMixSav1a	ForMixSav1b	ForMixSav1c	ForMixCon	ForDYCon6	ForDYConT1a	ForDYConT1b	ForDYConT1c	ForDYConOW1a	ForDYConOW1b	ForDYConOW1c	ForDMCon6	ForDMConT1a	ForDMConT1b	ForDMConT1c	ForDMConSav1a	ForDMConSav1b	ForDMConSav1c	ForSav1	ForOW1	ForMix1	ForTYCon1	ForDYCon1
									WildfireRisk	NoClimateChange	MinorClimateChange	ModestClimateChange	BigClimateChange	FireDeptProtects	WildfireIndiscriminant	LittleCanDo	CommunityHelps	PropertyProtected	ManageVersusLeaveAlone	HumanNeedsVersusNature	NoGovernVersusRegulate	DoNothingMixed		MixToOakWoods	NoCostMixToOakWoods	ProfitMixToOakWoods	MixToSavanna	NoCostMixToSavanna	ProfitMixToSavanna	MixToThinCon	DoNothingDenseYoungCon	ThinDenseYoungCon	NoCostThinDenseYoungCon	ProfitThinDenseYoungCon	DenseYoungConToOakWoods	NoCostDenseYoungConToOakWoods	ProfitDenseYoungConToOakWoods	DoNothingDenseMatureCon	ThinDenseMatureCon	NoCostThinDenseMatureCon	ProfitThinDenseMatureCon	DenseMatureConToSavanna	NoCostDenseMatureConToSavanna	ProfitDenseMatureConToSavanna	SBsavanna	SBoakWoodland	SBmixed Forest	SBThinYoungCon	SBdenseYoungCon
1	1101718	JLM	40217	FMS	Vol	25787	Lane	Rural Residential	4	0	3	2	.	4	5	6	6	7	-3	-1	-1	20	0	0	0	0	0	0	0	0	20	20	20	20	0	0	0	.	.	.	.	.	.	.	4	4	4	2	1
2	1105788	AGP	40269	FMS	Vol	19545	Lane	Farmers	4	0	1	2	4	6	1	1	7	6	3	1	2	100	0	0	0	0	0	0	0	0	.	.	.	.	.	.	.	.	.	.	.	.	.	.	3	3	3	3	3
3	1109303	JLM	40217	FMS	Vol	24392	Lane	Rural Residential	6	0	3	3	2	5	2	5	6	3	-2	-2	-2	25	0	5	25	45	35	45	65	0	65	25	55	85	15	50	70	75	15	50	70	25	40	80	5	4	3	-2	2
4	1111794	AGP	40274	FMS	Vol	24286	Lane	Rural Residential	4	0	1	2	4	2	5	5	2	2	-2	-3	-1	80	2	20	20	30	10	10	20	5	79	10	10	10	10	10	10	.	.	.	.	.	.	.	5	4	1	1	1
5	1111823	AGP	40268	FMS	Vol	13410	Lane	Foresters	2	1	.	.	.	4	4	4	4	4	.	.	3	.	.	.	.	.	.	.	.	.	.	.	.	.	.	.	.	.	.	.	.	.	.	.	.	.	.	.	.
6	1201047	AGP	40273	FMS	Vol	26104	Lane	Multi-purpose Smallholders	6	1	.	.	.	4	2	2	4	6	2	0	-3	.	.	.	.	.	.	.	.	.	95	5	5	5	5	5	5	.	.	.	.	.	.	.	4	0	4	4	4
7	1201430	JLM	40217	FMS	Vol	86877	Lane	Rural Residential	6	0	3	2	1	4	2	2	5	5	0	-2	-2	5	75	95	95	95	5	5	5	5	.	.	.	.	.	.	.	.	.	.	.	.	.	.	5	4	0	0	0
8	1201876	AGP	40210	FMS	Rand	78461	Lane	Rural Residential	4	0	0	2	0	6	4	4	6	5	-1	-1	-2	45	5	5	5	5	5	5	5	5	.	.	.	.	.	.	.	.	.	.	.	.	.	.	5	5	4	3	-5
9	1202027	AGP	40206	FMS	Rand	81861	Lane	Rural Residential	7	0	2	1	1	5	2	5	5	3	.	.	.	0	100	0	0	0	0	0	0	0	.	.	.	.	.	.	.	.	.	.	.	.	.	.	5	5	5	-1	.
10	1202094	AGP	40210	FMS	Rand	17787	Lane	Rural Residential	4	0	.	.	.	1	2	3	4	.	.	.	.	.	.	.	.	.	.	.	.	.	.	.	.	.	.	.	.	.	.	.	.	.	.	.	.	.	0	.	.
11	1202283	AGP	40210	FMS	Rand	86787	Lane	Rural Residential	5	0	3	2	1	5	4	2	5	5	-2	-3	1	.	.	.	.	.	.	.	.	.	3	28	38	65	5	5	5	.	.	.	.	.	.	.	.	3	2	3	3
12	1202338	AGP	40210	FMS	Rand	18499	Lane	Multi-purpose Smallholders	6	1	.	.	.	4	2	2	6	5	3	3	3	.	.	.	.	.	.	.	.	.	.	.	.	.	.	.	.	.	.	.	.	.	.	.	0	0	0	0	0
13	1202383	AGP	40210	FMS	Rand	80485	Lane	Rural Residential	2	0	3	3	2	4	4	4	4	4	.	.	.	.	.	.	.	.	.	.	.	.	.	.	.	.	.	.	.	.	.	.	.	.	.	.	5	5	5	.	.
14	1202425	AGP	40210	FMS	Rand	79385	Lane	Rural Residential	4	0	2	3	0	1	1	6	7	1	2	0	2	95	100	4	4	52	5	5	.	3	100	2	2	42	2	2	2	100	2	2	32	2	2	32	3	2	3	-4	2
15	1202578	AGP	40204	FMS	Rand	21203	Lane	Rural Residential	2	0	.	.	.	6	4	3	6	5	-3	-3	-3	100	2	.	.	.	.	.	.	.	100	.	.	.	.	.	.	.	.	.	.	.	.	.	.	.	.	4	.
16	1202579	AGP	40210	FMS	Rand	22436	Lane	Foresters	.	0	1	1	0	6	2	2	6	6	3	3	2	15	85	5	5	5	5	5	5	5	8	15	35	65	5	5	5	5	15	25	75	5	5	5	3	2	2	.	4
17	1202663	AGP	40211	FMS	Rand	86815	Lane	Rural Residential	7	0	1	2	.	5	1	3	2	2	0	-1	1	100	25	15	15	15	15	15	5	55	85	10	0	0	0	0	0	85	5	5	5	5	5	5	0	-2	1	1	-3
18	1202905	JLM	40205	FMS	Rand	86585	Lane	Rural Residential	7	0	2	2	2	6	5	3	2	5	0	0	0	95	0	0	0	0	0	0	0	0	100	0	0	0	0	0	0	0	0	0	0	0	0	0	3	2	3	1	4
19	1202996	AGP	40211	FMS	Rand	87043	Lane	Rural Residential	6	0	0	0	2	5	5	3	3	6	1	1	1	.	.	.	.	.	.	.	.	.	.	.	.	.	.	.	.	.	.	.	.	.	.	.	3	-1	2	-1	.
20	1203571	JLM	40214	FMS	Rand	86858	Lane	Rural Residential	6	0	1	0	0	4	5	6	6	3	-1	-2	1	95	5	5	5	5	5	5	5	5	55	5	5	5	5	5	5	55	15	15	15	5	5	5	3	3	2	3	2
21	1203725	JLM	40214	FMS	Rand	87036	Lane	Rural Residential	4	0	2	0	0	6	5	4	4	5	0	0	0	.	.	.	.	.	.	.	.	.	27	.	.	.	.	.	.	25	35	85	.	.	.	.	4	4	4	1	4
22	1203763	AGP	40211	FMS	Rand	86632	Lane	Rural Residential	4	0	.	2	.	6	2	2	4	5	1	-1	1	55	15	25	45	65	25	45	65	55	.	.	.	.	.	.	.	5	35	45	55	25	35	45	3	2	4	-2	2
23	1203776	AGP	40211	FMS	Rand	86629	Lane	Rural Residential	6	0	2	2	0	5	4	3	3	5	2	-2	-1	15	15	15	55	65	15	45	45	15	15	15	35	65	15	35	45	95	15	35	85	15	45	65	4	4	2	4	1
24	1203797	AGP	40211	FMS	Rand	87169	Lane	Rural Residential	4	0	1	1	0	6	2	2	6	4	2	1	3	.	.	.	.	.	.	.	.	.	.	.	.	.	.	.	.	.	.	.	.	.	.	.	3	3	3	3	3
25	1211122	AGP	40217	FMS	Vol	13186	Lane	Rural Residential	6	0	0	0	0	4	3	3	5	5	-2	-2	-1	95	0	0	0	0	0	0	0	0	.	.	.	.	.	.	.	.	.	.	.	.	.	.	5	4	4	-3	-3
26	1211317	JLM	40217	FMS	Vol	81154	Lane	Multi-purpose Smallholders	5	1	.	.	.	6	1	2	4	4	3	3	0	95	5	5	35	55	5	35	55	5	.	.	.	.	.	.	.	.	.	.	.	.	.	.	4	3	3	-5	-1
27	1212699	AGP	40217	FMS	Vol	86511	Lane	Farmers	3	0	3	2	0	6	1	1	6	6	1	-1	-1	55	5	5	65	75	15	65	75	5	.	.	.	.	.	.	.	.	.	.	.	.	.	.	4	3	3	0	0
28	1213690	JLM	40217	FMS	Vol	85638	Lane	Rural Residential	4	0	3	2	1	5	3	2	5	2	-3	-3	-3	100	0	0	0	0	0	0	0	0	.	3	3	4	4	5	5	.	5	4	4	5	5	5	4	4	5	2	4
29	1214358	KC	40213	FMS	Vol	85621	Lane	Farmers	5	0	3	2	1	4	5	3	5	4	2	-2	-1	93	3	22	95	95	2	75	75	0	.	.	.	.	.	.	.	.	.	.	.	.	.	.	5	5	5	5	2
30	1215637	AGP	40266	FMS	Vol	13450	Lane	Rural Residential	6	0	4	4	4	5	2	2	4	4	3	0	-1	85	5	5	5	15	5	5	5	5	.	.	.	.	.	.	.	.	.	.	.	.	.	.	4	3	3	1	2
31	1215865	JLM	40214	FMS	Vol	75101	Lane	Rural Residential	4	0	2	2	0	6	3	3	5	6	1	-2	-1	35	5	15	15	45	25	45	55	15	26	85	75	75	15	25	25	45	35	45	45	15	15	15	4	4	3	2	4
32	1216145	AGP	40217	FMS	Vol	80779	Lane	Foresters	5	0	0	2	2	4	5	4	6	5	1	-3	3	.	.	.	.	.	.	.	.	.	95	75	65	45	75	45	55	.	.	.	.	.	.	.	2	4	3	5	3
33	1216428	JLM	40217	FMS	Vol	85408	Lane	Rural Residential	5	0	3	2	2	5	2	2	3	4	-1	-2	0	35	5	5	5	5	5	5	5	5	85	5	5	5	5	5	5	86	5	5	5	5	5	15	3	0	1	0	1
34	1218980	AGP	40211	FMS	Rand	85264	Lane	Rural Residential	6	0	2	.	.	5	2	2	4	2	2	-2	2	90	20	0	10	20	.	.	.	.	.	.	.	.	.	.	.	.	.	.	.	.	.	.	3	3	3	.	3
35	1219184	AGP	40206	FMS	Rand	79008	Lane	Rural Residential	5	0	3	2	1	5	1	1	7	5	-1	-2	-3	.	.	.	.	.	.	.	.	.	.	.	.	.	.	.	.	.	.	.	.	.	.	.	5	5	5	0	2
36	1219531	AGP	40206	FMS	Rand	73427	Lane	Rural Residential	.	0	3	2	0	3	2	2	5	6	2	2	1	.	.	.	.	.	.	.	.	.	.	.	.	.	.	.	.	.	.	.	.	.	.	.	3	3	2	2	2
37	1219632	JLM	40205	FMS	Rand	82199	Lane	Rural Residential	3	0	0	0	0	5	3	2	5	5	2	1	2	76	13	5	5	5	5	5	5	55	5	5	5	5	5	5	5	.	.	.	.	.	.	.	3	2	2	2	2
38	1901369	JLM	40217	FMS	Vol	37211	Linn	Rural Residential	5	0	2	2	2	5	2	2	7	5	0	-2	3	90	5	5	8	6	2	4	7	14	15	8	8	15	5	7	7	.	.	.	.	.	.	.	4	5	5	-4	3
39	1903002	JLM	40217	FMS	Vol	23362	Linn	Multi-purpose Smallholders	.	0	3	2	2	5	5	5	5	1	0	0	-2	.	.	.	.	.	.	.	.	.	.	.	.	.	.	.	.	.	.	.	.	.	.	.	5	5	5	5	5
40	1907354	AGP	40207	FMS	Rand	35961	Linn	Rural Residential	4	0	.	.	.	4	1	1	4	4	3	0	3	15	5	0	0	0	0	0	0	0	.	0	0	0	0	0	0	.	0	0	0	0	0	0	0	0	0	0	0
41	1908242	KC	40204	FMS	Rand	24156	Linn	Foresters	4	0	1	1	0	6	4	2	6	6	0	0	2	.	.	.	.	.	.	.	.	.	65	15	13	5	0	0	0	3	5	5	5	0	0	0	0	0	0	4	3
42	1909792	AGP	40206	FMS	Rand	35386	Linn	Rural Residential	5	0	3	3	3	5	7	5	5	1	-2	-2	-2	12	4	0	0	0	0	0	0	0	.	.	.	.	.	.	.	0	.	.	.	0	0	0	4	4	3	4	4
43	1909872	KC	40204	FMS	Rand	37026	Linn	Multi-purpose Smallholders	5	0	3	2	0	4	3	5	3	4	-1	-3	-2	97	0	0	2	2	1	4	4	0	.	.	.	.	.	.	.	.	.	.	.	.	.	.	4	3	2	0	4
44	1911683	AGP	40214	FMS	Vol	34867	Linn	Rural Residential	4	0	3	0	0	4	2	3	4	5	1	-2	0	90	0	0	0	0	0	0	0	0	.	.	.	.	.	.	.	90	0	0	0	0	0	0	4	1	2	-1	3
45	1916306	AGP	40268	FMS	Vol	33775	Linn	Multi-purpose Smallholders	5	0	1	2	3	4	1	2	6	6	3	-3	0	95	2	100	0	0	.	.	.	3	.	.	.	.	.	.	.	.	.	.	.	.	.	.	5	-5	-5	.	0
46	2101569	KC	40213	FMS	Vol	19709	Lane	Farmers	4	0	0	0	0	7	1	1	7	6	2	3	3	93	5	0	0	0	0	0	0	0	.	.	.	.	0	0	0	.	.	.	.	0	0	0	5	5	.	.	.
47	2101985	JLM	40217	FMS	Vol	25889	Lane	Rural Residential	4	0	3	2	2	5	5	3	5	4	3	-1	2	35	15	10	10	10	10	10	10	10	.	8	50	70	10	10	10	.	.	.	.	.	.	.	0	-2	0	4	-2
48	2103392	AGP	40211	FMS	Rand	27755	Lane	Multi-purpose Smallholders	4	0	3	2	1	6	5	3	4	3	-1	0	1	95	5	0	0	0	0	0	0	0	.	.	.	.	.	.	.	.	.	.	.	.	.	.	5	4	3	-2	2
49	2103428	AGP	40206	FMS	Rand	86922	Lane	Rural Residential	6	0	.	.	.	.	6	5	4	.	2	2	2	.	5	5	5	5	5	5	5	5	.	.	.	.	.	.	.	.	5	5	5	5	5	5	2	0	1	3	3
50	2103436	AGP	40211	FMS	Rand	74255	Lane	Rural Residential	6	0	0	0	0	5	5	3	2	4	2	1	2	85	25	5	15	15	5	15	15	15	25	85	95	95	5	8	12	.	.	.	.	.	.	.	4	4	4	4	4
51	2103544	AGP	40205	FMS	Rand	86219	Lane	Multi-purpose Smallholders	5	0	2	2	0	5	5	3	4	4	2	0	1	85	15	15	35	65	10	10	10	.	65	15	15	15	10	10	10	15	15	20	25	15	20	25	5	3	5	1	1
52	2103725	AGP	40211	FMS	Rand	22467	Lane	Rural Residential	4	0	.	3	2	5	2	2	4	5	0	-1	-1	95	15	5	5	5	8	8	15	5	15	65	65	65	25	25	25	.	.	.	.	.	.	.	5	5	5	2	2
53	2104170	AGP	40211	FMS	Rand	21532	Lane	Rural Residential	5	0	.	2	0	5	3	5	2	5	1	-1	-2	.	.	.	.	.	.	.	.	.	.	.	.	.	.	.	.	.	.	.	.	.	.	.	3	1	2	1	2
54	2104175	AGP	40205	FMS	Rand	65778	Lane	Rural Residential	6	0	3	2	1	4	4	4	4	4	1	-3	-1	65	15	.	.	.	.	.	.	.	.	.	.	.	.	.	.	.	.	.	.	.	.	.	5	5	5	3	3
55	2104322	AGP	40211	FMS	Rand	20666	Lane	Multi-purpose Smallholders	.	1	.	.	.	6	2	2	4	5	3	-1	1	75	75	5	5	5	5	5	5	85	5	5	5	5	5	5	5	.	.	.	.	.	.	.	2	0	-3	2	0
56	2104490	AGP	40211	FMS	Rand	19923	Lane	Multi-purpose Smallholders	4	1	.	.	.	6	5	1	4	5	3	3	3	.	.	.	.	.	.	.	.	.	.	.	.	.	.	.	.	.	.	.	.	.	.	.	2	-1	0	3	3
57	2111546	AGP	40268	FMS	Vol	19111	Lane	Rural Residential	5	1	.	.	.	5	3	2	2	5	2	0	3	.	.	.	.	.	.	.	.	.	55	15	15	15	2	2	2	5	22	5	75	5	15	48	3	-3	-2	1	3
58	2111841	AGP	40217	FMS	Vol	80117	Lane	Farmers	7	0	3	3	2	3	2	2	6	3	1	-1	-2	50	0	0	50	50	.	.	.	0	.	.	.	.	.	.	.	50	5	20	20	0	0	0	5	4	4	3	-1
59	2112241	JLM	40214	FMS	Vol	18965	Lane	Rural Residential	6	0	2	2	2	4	2	2	5	5	3	0	3	.	.	.	.	.	.	.	.	.	.	.	.	.	.	.	.	.	.	.	.	.	.	.	5	3	3	0	-1
60	2113625	KC	40213	FMS	LMS	23093	Lane	Multi-purpose Smallholders	6	0	3	2	1	5	1	1	4	5	3	-3	-1	95	.	15	15	15	15	15	15	18	18	15	15	75	6	35	67	11	0	22	57	2	12	75	5	-2	2	0	3
61	2114420	KC	40213	FMS	LMS	48933	Lane	Farmers	4	0	.	2	0	5	2	4	4	4	2	-1	0	.	.	.	.	.	.	.	.	.	.	.	.	.	.	.	.	.	.	.	.	.	.	.	1	2	0	0	0
62	2114529	KC	40213	FMS	Vol	85643	Lane	Rural Residential	7	0	.	.	2	5	2	6	5	1	1	-3	-3	100	0	2	2	2	2	2	2	15	100	5	5	5	2	2	2	100	5	5	2	2	5	2	4	2	5	0	3
63	2116008	AGP	40273	FMS	Vol	12838	Lane	Multi-purpose Smallholders	5	0	1	2	3	5	3	2	5	5	2	0	1	25	25	5	15	25	25	25	35	25	35	15	25	35	15	25	35	.	15	15	35	5	15	15	3	3	2	2	4
64	2116484	AGP	40267	FMS	LMS	86265	Lane	Rural Residential	6	0	1	2	3	1	3	5	3	3	-2	-3	-2	75	5	50	70	90	5	25	75	5	60	65	75	80	45	65	85	75	65	75	85	5	35	65	5	4	4	3	3
65	2118072	AGP	40214	FMS	Vol	85307	Lane	Rural Residential	6	0	1	.	.	6	5	5	5	2	0	-1	0	10	0	20	40	.	10	30	0	0	.	.	.	.	.	.	.	.	.	.	.	.	.	.	4	3	.	3	-1
66	2118880	JLM	40217	FMS	Vol	85898	Lane	Rural Residential	7	0	.	3	.	6	1	1	7	2	1	-1	-2	97	4	5	5	5	5	5	5	5	.	.	.	.	.	.	.	.	.	.	.	.	.	.	5	4	4	4	4
67	2119808	AGP	40211	FMS	Rand	76221	Lane	Multi-purpose Smallholders	5	0	2	1	.	4	3	2	3	5	-3	-3	-3	95	0	0	0	0	0	0	0	0	.	.	.	.	.	.	.	.	.	.	.	.	.	.	4	4	4	-3	-2
68	2701510	JLM	40217	FMS	Vol	22873	Lane	Multi-purpose Smallholders	5	0	3	2	1	4	3	3	5	6	-3	-3	2	25	15	35	65	75	25	45	65	75	5	35	55	75	25	45	55	100	10	10	10	15	45	65	4	3	4	1	4
69	2702881	JLM	40217	FMS	Vol	86409	Lane	Farmers	2	1	.	.	.	5	2	1	4	7	2	0	-2	100	0	0	0	0	0	0	0	0	.	.	.	.	.	.	.	.	.	.	.	.	.	.	5	5	3	-3	-2
70	2702962	JLM	40214	FMS	Vol	77947	Lane	Rural Residential	4	1	.	.	.	4	4	3	2	2	3	1	3	45	95	5	5	55	15	8	0	54	.	.	.	.	.	.	.	.	45	5	5	5	4	4	3	3	3	3	4
71	2704700	AGP	40211	FMS	Rand	10934	Lane	Rural Residential	5	0	2	1	0	4	6	4	5	2	-2	2	3	.	.	.	.	.	.	.	.	.	100	5	5	5	5	5	15	89	15	5	5	5	5	5	1	-1	4	4	4
72	2704920	AGP	40211	FMS	Rand	21386	Lane	Foresters	6	0	2	3	2	5	5	3	3	4	3	-2	-1	90	70	70	70	70	10	10	10	20	10	80	80	80	10	10	10	.	.	.	.	.	.	.	5	5	5	.	3
73	2704946	AGP	40205	FMS	Rand	20759	Lane	Foresters	5	0	0	0	0	4	1	1	5	6	.	.	.	50	50	0	0	0	0	0	0	10	0	0	0	0	0	0	0	.	.	.	.	.	.	.	3	3	3	3	3
74	2704990	KC	40211	FMS	Rand	22028	Lane	Farmers	5	1	.	.	.	5	3	1	3	5	2	2	2	.	.	.	.	.	.	.	.	.	.	.	.	.	.	.	.	.	.	.	.	.	.	.	5	3	0	4	0
75	2705155	JLM	40205	FMS	Rand	65795	Lane	Multi-purpose Smallholders	4	0	2	0	0	6	2	4	4	5	-2	-2	-1	.	.	.	.	.	.	.	.	.	.	.	.	.	.	.	.	.	.	.	.	.	.	.	0	3	3	.	0
76	2705415	KC	40211	FMS	Rand	9253	Lane	Multi-purpose Smallholders	3	1	.	.	.	4	3	3	3	4	1	1	3	.	.	.	.	.	.	.	.	.	.	.	.	.	.	.	.	.	.	.	.	.	.	.	4	4	4	2	3
77	2705516	KC	109972	FMS	Rand	86335	Lane	Rural Residential	5	0	3	0	0	5	4	3	4	4	2	0	1	97	55	5	5	5	5	5	5	5	77	7	8	7	5	5	5	.	.	.	.	.	.	.	4	2	1	1	-1
78	2705707	AGP	40206	FMS	Rand	21246	Lane	Farmers	5	0	2	2	1	4	1	1	1	2	1	0	.	.	.	0	0	0	0	0	0	0	.	15	6	6	5	5	5	.	.	.	.	.	.	.	3	3	3	-1	2
79	2705814	KC	40204	FMS	Rand	32740	Lane	Foresters	3	1	.	.	.	6	4	5	5	7	-3	0	3	100	.	.	.	.	.	.	.	.	.	30	50	60	.	.	.	.	.	.	.	.	.	.	3	3	3	3	3
80	2705839	KC	40211	FMS	Rand	26484	Lane	Farmers	3	0	3	2	3	3	5	5	1	5	1	1	2	30	70	20	50	60	20	60	70	90	30	40	50	60	0	0	0	30	50	50	70	0	0	50	4	2	2	1	3
81	2706043	KC	40211	FMS	Rand	85355	Lane	Multi-purpose Smallholders	4	1	.	.	.	7	3	2	4	5	0	0	3	.	.	.	.	.	.	.	.	.	.	.	.	.	.	.	.	97	3	36	56	3	3	3	3	1	2	0	4
82	2706237	KC	40211	FMS	Rand	17586	Lane	Farmers	3	0	2	1	0	5	2	4	5	4	2	-1	2	.	.	.	.	.	.	.	.	.	20	0	0	51	.	.	.	.	.	.	.	.	.	.	.	.	.	.	4
83	2706386	KC	40211	FMS	Rand	85831	Lane	Multi-purpose Smallholders	5	0	0	3	2	3	2	5	5	5	1	2	-1	5	5	5	25	75	5	35	95	45	25	5	5	5	5	5	5	.	.	.	.	.	.	.	4	2	4	-5	3
84	2706589	JLM	40214	FMS	Rand	22712	Lane	Farmers	4	1	.	.	.	6	2	2	2	4	3	2	3	75	15	5	15	5	5	5	5	5	.	.	.	.	.	.	.	.	.	.	.	.	.	.	3	3	.	.	.
85	2706806	JLm	40204	FMS	Rand	21568	Lane	Farmers	3	0	0	0	0	4	2	2	6	4	2	1	2	.	.	.	.	.	.	.	.	.	.	.	.	.	.	.	.	.	.	.	.	.	.	.	3	2	2	3	2
86	2713986	JLM	40214	FMS	Vol	22132	Lane	Foresters	5	0	3	2	1	5	2	1	4	5	2	-2	-2	50	100	0	0	0	0	0	0	0	25	80	90	100	0	0	0	50	70	80	100	0	0	0	5	3	2	-1	0
87	2714734	KC	40213	FMS	Vol	85868	Lane	Farmers	4	0	3	2	0	4	2	3	4	4	0	0	0	.	.	.	.	.	.	.	.	.	.	.	.	.	.	.	.	.	.	.	.	.	.	.	3	3	3	3	2
88	2717172	KC	40211	FMS	Rand	21678	Lane	Rural Residential	.	1	.	.	.	4	1	1	3	4	3	1	3	.	.	.	.	.	.	.	.	.	.	.	.	.	.	.	.	.	.	.	.	.	.	.	2	0	1	1	2
89	2717462	KC	40211	FMS	Rand	77933	Lane	Rural Residential	5	0	.	3	2	5	3	2	4	3	-3	-3	-2	65	25	65	75	75	65	75	75	15	.	.	.	.	.	.	.	.	.	.	.	.	.	.	5	4	3	2	4
90	2717463	JLM	40205	FMS	Rand	86344	Lane	Farmers	7	0	3	3	3	7	3	4	6	4	0	-3	2	.	.	.	.	.	.	.	.	.	95	25	.	.	.	.	.	.	.	.	.	.	.	.	5	5	.	.	5
91	2717476	KC	40211	FMS	Rand	72534	Lane	Foresters	2	0	1	0	0	6	4	3	6	5	0	0	-2	.	.	100	100	100	100	100	100	0	.	55	55	55	100	100	100	.	55	55	55	25	25	25	5	5	3	2	1
92	2717595	KC	40211	FMS	Rand	86683	Lane	Multi-purpose Smallholders	5	0	.	3	.	5	3	3	3	7	3	3	3	.	0	10	0	0	0	0	0	40	10	90	90	90	0	0	0	.	.	.	.	.	.	.	4	3	3	5	5
93	2717908	AGP	40206	FMS	Rand	78112	Lane	Forested Estates	.	0	.	.	.	.	.	.	.	.	.	.	.	.	.	.	.	.	.	.	.	.	.	.	.	.	.	.	.	.	.	.	.	.	.	.	.	.	.	.	.
94	2718857	AGP	40206	FMS	Rand	68797	Lane	Farmers	6	0	.	.	.	5	5	5	5	5	0	.	3	95	5	.	.	.	.	.	.	5	.	.	.	.	.	.	.	.	.	.	.	.	.	.	3	3	3	.	.
95	2719082	KC	40211	FMS	Rand	34939	Lane	Farmers	3	0	3	2	0	3	3	3	4	4	1	-1	-2	.	.	.	.	.	.	.	.	.	.	.	.	.	.	.	.	.	.	.	.	.	.	.	4	2	3	1	1
96	2719510	KC	40211	FMS	Rand	85122	Lane	Farmers	5	0	3	3	2	4	2	2	6	5	0	1	3	.	.	.	.	.	.	.	.	.	.	.	.	.	.	.	.	.	.	.	.	.	.	.	5	5	4	0	2
97	3401408	JLM	40217	FMS	LMS	86238	Lane	Farmers	5	0	2	2	2	5	5	3	3	3	-2	-3	-3	100	0	0	0	0	0	0	0	0	.	.	.	.	.	.	.	.	.	.	.	.	.	.	3	4	3	-1	2
98	3401525	JLM	40217	FMS	Vol	18579	Lane	Rural Residential	5	0	3	2	1	3	1	2	6	3	1	-2	0	96	58	5	5	5	25	25	25	25	25	95	95	95	0	0	0	46	38	38	57	0	0	0	2	-2	3	2	3
99	3401667	KC	40211	FMS	Rand	18481	Lane	Multi-purpose Smallholders	2	1	.	.	.	6	1	1	7	6	2	-1	-2	100	0	0	0	0	.	.	.	0	.	.	.	.	.	.	.	.	.	.	.	.	.	.	2	3	2	5	5
100	3401681	AGP	40206	FMS	Rand	10006	Lane	Rural Residential	6	0	2	0	0	5	3	2	5	6	-1	-1	-3	.	.	.	.	.	.	.	.	.	.	.	.	.	.	.	.	.	.	.	.	.	.	.	5	4	3	2	1
101	3401854	KC	40211	FMS	Rand	86604	Lane	Rural Residential	3	0	0	0	0	5	3	2	4	1	1	-2	0	31	20	20	40	70	10	24	33	4	20	31	41	50	10	25	42	18	35	30	48	30	20	60	3	3	2	0	1
102	3401918	KC	40211	FMS	Rand	19871	Lane	Farmers	4	1	.	.	.	6	2	1	5	7	2	-1	3	100	0	0	0	0	0	0	0	3	.	.	.	.	.	.	.	.	.	.	.	.	.	.	3	4	5	3	5
103	3401940	KC	40211	FMS	Rand	20702	Lane	Rural Residential	6	0	.	3	2	4	2	3	5	2	2	-2	2	55	55	5	35	75	7	36	65	20	.	.	.	.	.	.	.	8	15	35	75	18	38	57	4	3	1	1	0
104	3401969	KC	40211	FMS	Rand	25840	Lane	Rural Residential	4	1	.	.	.	6	6	2	4	6	-1	-1	3	100	0	0	0	0	0	0	0	0	100	0	0	0	0	0	0	100	0	0	0	0	0	0	5	5	5	5	5
105	3402031	AGP	40206	FMS	Rand	24546	Lane	Multi-purpose Smallholders	1	0	1	1	.	5	3	4	1	5	-3	-3	3	75	45	35	45	75	25	45	65	25	85	15	25	55	28	38	55	.	0	15	25	25	38	48	-2	-2	2	3	3
106	3402113	AGP	40206	FMS	Rand	26256	Lane	Farmers	.	1	.	.	.	3	4	4	4	6	0	0	0	.	.	.	.	.	.	.	.	.	.	.	.	.	.	.	.	.	.	.	.	.	.	.	.	.	.	.	.
107	3402114	AGP	40212	FMS	Rand	25167	Lane	Multi-purpose Smallholders	.	0	0	3	0	5	5	3	2	5	-2	.	-1	2	2	.	.	.	.	.	.	.	2	2	2	2	2	2	2	.	.	.	.	.	.	.	3	3	3	2	-1
108	3402135	AGP	40212	FMS	Rand	21280	Lane	Rural Residential	4	0	2	1	0	3	2	1	6	7	.	.	.	25	0	0	0	0	0	0	0	30	90	0	0	0	0	0	0	0	0	0	0	0	0	0	3	4	4	4	4
109	3402206	AGP	40212	FMS	Rand	26596	Lane	Multi-purpose Smallholders	4	1	.	.	.	7	1	3	3	4	0	0	3	5	45	5	5	5	5	5	5	5	5	35	35	35	5	5	5	55	45	45	45	5	5	5	3	2	2	1	0
110	3402368	JLM	40212	FMS	Rand	22960	Lane	Rural Residential	4	0	0	0	0	5	3	2	2	4	0	0	2	7	7	6	6	6	5	5	.	5	65	35	25	5	5	5	5	85	5	5	5	5	5	5	4	3	3	3	3
111	3402446	JLM	40212	FMS	Rand	23364	Lane	Rural Residential	6	0	3	3	2	4	2	3	2	4	2	-2	2	.	.	.	.	.	.	.	.	.	.	.	.	.	.	.	.	.	.	.	.	.	.	.	4	3	3	0	-1
112	3402462	AGP	40205	FMS	Rand	11028	Lane	Rural Residential	6	1	.	.	.	2	1	1	5	1	1	1	1	40	60	10	10	10	0	0	0	95	0	100	100	100	100	100	100	0	100	100	100	80	80	80	4	4	-5	-2	-2
113	3411159	JLM	40217	FMS	Vol	26917	Lane	Multi-purpose Smallholders	4	0	3	2	1	2	2	2	4	4	0	-1	-1	94	5	4	44	84	5	26	44	5	5	5	25	35	4	27	36	100	5	25	35	5	5	55	5	4	4	1	2
114	3412005	AGP	40217	FMS	LMS	12147	Lane	Rural Residential	6	0	.	.	.	5	6	6	6	4	3	3	3	.	.	.	.	.	.	.	.	.	.	.	.	.	.	.	.	45	.	.	.	.	.	.	.	3	0	1	2
115	3412197	AGP	40274	FMS	LMS	18793	Lane	Rural Residential	6	0	1	2	3	5	1	2	5	5	3	-2	0	92	45	5	5	5	5	5	5	5	5	5	35	45	15	25	25	5	85	85	85	5	5	5	4	4	4	3	3
116	3413562	AGP	40274	FMS	Vol	18397	Lane	Multi-purpose Smallholders	6	0	4	4	4	5	3	5	5	5	3	0	3	5	5	0	0	0	0	0	0	0	.	.	.	.	.	.	.	.	.	.	.	.	.	.	5	5	5	4	5
117	3414254	AGP	40217	FMS	Vol	81936	Lane	Farmers	4	1	.	.	.	5	3	2	1	5	3	3	3	0	0	0	0	0	0	0	0	0	.	0	0	0	0	0	0	100	0	0	0	0	0	0	3	2	3	4	3
118	3415289	JLM	40214	FMS	Vol	33014	Lane	Forested Estates	4	0	.	.	.	6	5	1	3	6	2	-2	1	45	25	15	55	55	55	55	55	15	15	5	5	5	5	5	5	.	.	.	.	.	.	.	4	5	5	-1	2
119	3415837	AGP	40269	FMS	Vol	22158	Lane	Multi-purpose Smallholders	4	0	2	4	4	6	2	3	4	4	3	2	1	.	.	.	.	.	.	.	.	.	.	.	.	.	.	.	.	.	.	.	.	.	.	.	2	2	4	2	3
120	3417044	JLM	40212	FMS	Rand	83675	Lane	Rural Residential	4	0	1	1	1	6	3	4	4	4	-2	-2	-2	96	3	5	5	5	4	3	3	4	4	4	4	4	4	4	4	98	5	5	5	5	5	5	4	.	5	4	4
121	3417197	JLM	40212	FMS	Rand	22203	Lane	Rural Residential	6	1	.	.	.	2	2	2	5	3	3	-1	3	95	8	37	55	74	8	16	25	26	.	.	.	.	.	.	.	.	.	.	.	.	.	.	4	1	1	1	2
122	3417995	AGP	40206	FMS	Rand	47131	Lane	Rural Residential	.	0	.	.	.	.	.	.	.	.	1	-2	-2	.	.	.	.	.	.	.	.	.	.	.	.	.	.	.	.	.	.	.	.	.	.	.	5	4	5	2	4
123	3418447	AGP	40213	FMS	Rand	9866	Lane	Multi-purpose Smallholders	4	1	.	.	.	5	2	1	3	7	2	.	1	.	.	.	.	.	.	.	.	.	.	.	.	.	.	.	.	5	2	5	5	5	5	5	4	4	4	-3	2
124	3418812	AGP	40206	FMS	Rand	18237	Lane	Multi-purpose Smallholders	.	1	.	.	.	6	2	2	3	4	2	0	2	.	0	0	0	0	0	0	0	0	.	.	.	.	.	.	.	.	.	.	.	.	.	.	0	0	4	-2	3
125	3418821	KC	40203	FMS	Rand	81003	Lane	Rural Residential	4	0	2	2	0	5	2	2	4	3	2	-1	-2	70	40	65	85	100	65	85	100	10	90	20	20	30	70	90	95	.	.	.	.	.	.	.	3	1	-1	3	4
126	3419016	AGP	40213	FMS	Rand	86371	Lane	Farmers	4	0	2	.	2	7	2	2	5	6	2	1	-1	.	.	.	.	.	.	.	.	.	.	.	.	.	.	.	.	.	.	.	.	.	.	.	4	4	4	0	2
127	3419058	JLM	40205	FMS	Rand	80476	Lane	Rural Residential	.	0	.	2	.	5	.	.	.	.	2	1	3	.	.	.	.	.	.	.	.	.	.	.	.	70	.	.	.	.	.	.	.	.	.	.	3	-2	0	0	0
128	3419078	AGP	40213	FMS	Rand	85265	Lane	Rural Residential	4	0	0	0	0	5	2	2	4	5	0	-1	-1	50	50	.	.	.	0	0	10	.	.	.	.	.	.	.	.	.	.	.	.	.	.	.	5	5	5	1	1
129	3419476	AGP	40213	FMS	Rand	21682	Lane	Rural Residential	2	1	.	.	.	6	6	2	6	7	3	3	3	70	30	10	0	10	0	20	20	40	0	20	20	40	0	0	10	5	5	5	5	5	5	5	2	3	.	4	1
130	3419808	AGP	40204	FMS	Rand	24454	Lane	Multi-purpose Smallholders	3	0	2	0	0	5	3	3	4	5	-1	-2	-2	.	.	0	0	0	0	0	0	0	.	.	.	.	.	.	.	.	0	0	0	0	0	0	4	3	3	1	2
131	3801073	AGP	40217	FMS	Vol	38045	Linn	Multi-purpose Smallholders	5	0	2	1	0	5	1	1	4	5	3	1	-1	.	.	.	.	.	.	.	.	.	25	85	75	85	5	5	5	.	.	.	.	.	.	.	2	4	5	3	5
132	3801574	JLM	40217	FMS	Vol	33773	Linn	Multi-purpose Smallholders	7	0	0	0	0	3	2	2	3	.	2	1	1	.	.	.	.	.	.	.	.	.	.	.	.	.	.	.	.	.	.	.	.	.	.	.	3	4	5	2	4
133	3813597	JLM	40217	FMS	Vol	46533	Linn	Farmers	.	0	3	1	0	6	2	2	5	6	2	0	-2	35	.	7	26	77	15	55	75	55	.	5	5	5	5	5	5	.	.	.	.	.	.	.	4	2	1	1	3
134	3815573	JLM	40217	FMS	Vol	28571	Linn	Rural Residential	3	1	.	.	.	5	5	3	5	4	3	-3	1	.	.	76	75	76	5	35	35	4	.	.	.	.	.	.	.	.	.	.	.	.	.	.	2	2	4	0	2
135	3817661	AGP	40207	FMS	Rand	36118	Linn	Rural Residential	4	0	2	2	0	4	3	3	4	5	1	-1	0	.	.	.	.	.	.	.	.	.	.	.	.	.	.	.	.	.	.	.	.	.	.	.	2	1	0	1	0
136	3817718	AGP	40207	FMS	Rand	46956	Linn	Rural Residential	4	0	0	0	0	5	3	3	4	3	0	-1	0	72	5	15	25	15	12	22	15	22	.	.	.	.	.	.	.	.	.	.	.	.	.	.	3	3	3	3	3
137	3817867	AGP	40205	FMS	Rand	18415	Linn	Farmers	1	0	2	2	0	7	3	6	5	5	1	-1	-1	0	10	0	0	0	0	0	0	0	.	.	.	.	.	.	.	0	0	0	0	0	0	0	4	3	4	0	-2
138	3818010	AGP	40207	FMS	Rand	36663	Linn	Rural Residential	5	0	.	.	0	6	1	1	6	6	2	-3	-3	100	0	0	0	0	0	0	0	.	.	.	.	.	.	.	.	100	0	0	0	0	0	0	.	.	5	.	.
139	3818302	AGP	40207	FMS	Rand	47077	Linn	Rural Residential	6	0	3	3	2	3	1	2	4	3	2	-1	-2	15	35	35	65	.	25	45	55	65	15	75	25	25	25	25	35	15	65	75	75	25	35	75	4	3	3	1	2
140	3818405	KC	40204	FMS	Rand	43239	Linn	Farmers	4	0	2	0	0	1	3	5	2	3	0	0	1	95	5	5	5	5	5	5	5	93	92	5	5	5	5	5	5	95	5	5	5	5	5	5	4	4	4	4	4
141	3818567	JLM	40204	FMS	Rand	46916	Linn	Rural Residential	4	0	.	2	2	5	2	2	4	4	1	0	-1	55	55	0	0	0	0	0	0	0	0	100	100	100	0	0	0	50	50	50	0	0	0	.	3	3	3	3	3
142	3818766	AGP	40207	FMS	Rand	47489	Linn	Forested Estates	6	0	3	0	0	1	3	2	6	2	3	0	0	25	100	15	0	55	15	0	55	100	0	0	0	0	0	0	0	0	0	0	.	0	0	35	3	2	2	3	3
143	3819560	AGP	40207	FMS	Rand	36714	Linn	Farmers	4	1	.	.	.	5	5	5	.	.	.	.	.	.	.	.	.	.	.	.	.	.	.	.	.	.	.	.	.	.	.	.	.	.	.	.	.	3	3	.	.
144	3819683	AGP	40207	FMS	Rand	46559	Linn	Farmers	4	0	2	0	0	6	3	3	4	5	1	1	2	50	0	5	5	5	0	0	0	52	.	.	.	.	.	.	.	.	.	.	.	.	.	.	4	3	3	3	3
145	3819876	AGP	40207	FMS	Rand	43461	Linn	Farmers	4	1	.	.	.	4	3	3	4	4	3	3	3	.	.	.	.	.	.	.	.	.	35	55	45	35	45	75	85	.	.	.	.	.	.	.	3	-2	3	3	3
146	3819962	AGP	40207	FMS	Rand	47259	Linn	Foresters	4	1	.	.	.	5	3	5	4	4	0	0	0	100	10	0	0	0	0	0	0	0	100	0	0	0	0	0	40	0	0	30	0	0	0	30	2	2	2	0	2
147	4101026	AGP	40273	FMS	Vol	35878	Linn	Farmers	4	0	3	.	.	5	2	2	5	6	1	1	2	95	5	5	5	5	5	5	5	5	.	.	.	.	.	.	.	.	.	.	.	.	.	.	2	3	4	1	4
148	4102164	JLM	40214	FMS	Vol	23081	Linn	Multi-purpose Smallholders	6	0	3	3	3	5	3	3	5	5	0	-2	0	55	7	13	23	23	15	15	14	25	76	5	15	15	5	5	5	55	5	5	5	5	5	15	3	3	4	4	5
149	4103321	AGP	40273	FMS	Vol	25246	Linn	Forested Estates	6	0	4	4	4	4	5	5	3	3	2	0	1	80	81	0	0	0	0	0	5	30	20	20	20	30	0	0	5	25	40	50	60	0	0	10	4	3	4	2	3
150	4103776	JLM	40217	FMS	Vol	34644	Linn	Multi-purpose Smallholders	4	0	2	1	0	5	2	3	5	3	2	1	-1	.	.	.	.	.	.	.	.	.	.	.	.	.	.	.	.	.	.	.	.	.	.	.	3	3	3	4	1
151	4104685	AGP	40207	FMS	Rand	33993	Linn	Rural Residential	.	0	2	2	2	1	2	3	3	2	2	-1	1	95	5	5	5	5	5	5	5	15	.	.	.	.	.	.	.	45	35	35	65	15	15	55	4	4	4	3	4
152	4104832	JLM	40207	FMS	Rand	36376	Linn	Rural Residential	5	0	.	.	3	1	2	6	6	2	0	-2	-2	49	4	49	85	85	49	85	85	6	49	64	93	97	18	48	66	.	.	.	.	.	.	.	5	4	5	4	3
153	4105378	JLM	40207	FMS	Rand	46154	Linn	Rural Residential	6	0	3	2	0	3	2	5	2	2	-1	0	2	.	.	.	.	.	.	.	.	.	.	.	.	.	.	.	.	100	0	0	0	0	0	0	0	3	3	1	.
154	4107926	JLM	40207	FMS	Rand	36061	Linn	Rural Residential	.	0	2	.	.	2	3	4	3	5	1	0	0	80	40	10	10	10	10	10	10	10	30	60	60	80	10	10	10	.	.	.	.	.	.	.	4	4	4	4	4
155	4109195	JLM	40207	FMS	Rand	34684	Linn	Multi-purpose Smallholders	2	0	.	.	.	5	1	4	4	5	0	0	3	90	0	0	0	0	0	0	0	0	0	0	0	0	0	0	0	.	.	.	.	.	.	.	3	2	2	-1	2
156	4112779	JLM	40217	FMS	Vol	34359	Linn	Multi-purpose Smallholders	4	0	2	0	0	5	2	2	4	5	2	1	-1	45	15	55	76	76	15	15	15	15	35	35	35	35	15	15	15	.	.	.	.	.	.	.	4	3	4	4	1
157	4801062	AGP	40268	FMS	Vol	23859	Linn	Farmers	3	1	.	.	.	4	3	3	4	5	0	2	-1	100	5	5	35	35	5	15	25	15	.	.	.	.	.	.	.	.	.	.	.	.	.	.	3	3	4	3	3
158	4801174	JLM	40217	FMS	Vol	45636	Linn	Farmers	3	0	0	.	.	4	5	3	3	5	2	.	2	.	.	.	.	.	.	.	.	.	.	.	.	.	.	.	.	.	.	.	.	.	.	.	0	0	0	.	.
159	4801593	JLM	40214	FMS	Rand	33816	Linn	Multi-purpose Smallholders	.	0	.	.	.	5	3	5	3	4	-1	-1	1	.	8	10	10	10	5	5	5	0	.	5	3	0	5	5	5	.	.	.	.	.	.	.	3	3	2	0	1
160	4802825	AGP	40217	FMS	Vol	21447	Linn	Foresters	5	0	3	2	1	4	3	5	5	4	2	-1	0	65	55	15	15	35	15	15	25	75	.	.	.	.	.	.	.	15	55	25	65	15	15	25	2	1	0	0	0
161	4804125	AGP	40210	FMS	Rand	46700	Linn	Multi-purpose Smallholders	3	0	0	0	0	4	3	5	5	1	0	0	3	0	85	0	0	0	0	0	0	0	52	50	50	95	0	0	0	50	50	0	100	0	0	100	0	1	-1	4	3
162	4804137	JLM	40207	FMS	Rand	36813	Linn	Foresters	2	1	2	.	.	1	6	2	3	6	3	3	3	.	.	.	.	.	.	.	.	.	15	15	15	25	7	8	9	65	25	23	23	5	5	5	-2	-4	-3	4	4
163	4804154	JLM	40207	FMS	Rand	36978	Linn	Foresters	3	0	3	2	1	5	3	2	5	5	-2	-2	2	96	0	8	8	7	3	4	5	0	.	.	.	.	.	.	.	16	0	0	0	0	0	0	4	4	1	-5	-4
164	4804365	JLM	40207	FMS	Rand	35043	Linn	Rural Residential	4	0	3	2	0	5	3	3	4	4	3	-2	0	.	.	.	.	.	.	.	.	.	.	.	.	.	.	.	.	.	.	.	.	.	.	.	.	.	.	.	.
165	4805492	JLM	40207	FMS	Rand	26909	Linn	Foresters	4	0	0	.	.	5	4	3	.	.	-1	-1	3	100	0	0	0	0	0	0	0	0	.	.	.	.	.	.	.	.	.	.	.	.	.	.	3	0	0	.	0
166	4805929	JLM	40207	FMS	Rand	38712	Linn	Farmers	.	1	.	.	.	5	5	3	5	4	-2	-2	2	0	0	0	0	10	0	0	0	0	37	28	29	37	9	8	9	.	.	.	.	.	.	.	1	.	0	0	0
167	4806301	JLM	40207	FMS	Rand	47322	Linn	Foresters	4	0	.	2	.	5	1	2	5	5	3	1	0	30	90	0	0	0	0	0	0	90	20	40	40	70	0	0	0	10	40	40	70	0	0	0	3	2	2	3	3
168	4806665	AGP	40203	FMS	Rand	44752	Linn	Forested Estates	.	0	.	.	.	.	.	.	.	.	.	.	.	.	.	.	.	.	.	.	.	.	.	.	.	.	.	.	.	.	.	.	.	.	.	.	.	.	.	.	.
169	4807059	JLM	40207	FMS	Rand	46579	Linn	Rural Residential	5	0	.	2	2	3	5	2	2	6	-2	-2	2	10	10	10	10	20	10	20	20	10	.	10	10	10	10	10	10	50	10	10	10	10	10	10	4	.	.	-3	-1
170	4809098	JLM	40207	FMS	Rand	31616	Linn	Foresters	5	0	.	2	.	5	2	3	4	4	2	2	0	95	25	5	5	55	15	15	55	35	25	35	35	15	5	5	5	15	45	5	15	5	5	5	2	2	0	3	0
171	4809124	JLM	40207	FMS	Rand	36298	Linn	Rural Residential	3	0	.	.	.	4	3	1	4	5	2	3	3	90	50	0	0	0	0	0	0	70	10	0	0	0	0	0	0	10	0	0	0	0	0	10	3	2	3	5	5
172	4809633	JLM	40204	FMS	Rand	23338	Linn	Foresters	2	0	3	2	0	4	5	3	4	3	-1	-1	0	95	5	.	.	.	.	.	.	.	.	.	.	.	.	.	.	.	.	.	.	.	.	.	4	3	3	.	.
173	4812186	JLM	40217	FMS	Vol	37491	Linn	Foresters	2	0	1	.	.	1	2	3	3	4	3	3	3	100	100	0	0	60	0	0	60	100	30	60	80	90	0	0	80	.	.	.	.	.	.	.	3	3	3	3	3
174	4812420	AGP	40267	FMS	NonVol	47340	Linn	Foresters	5	0	0	0	0	3	2	4	6	4	3	-3	3	0	100	100	100	100	20	80	100	100	0	25	98	98	18	78	88	8	18	35	65	75	65	95	5	5	0	5	1
175	4812785	AGP	40268	FMS	Vol	47002	Linn	Foresters	5	0	1	2	3	5	3	2	5	5	1	-1	-1	.	.	.	.	.	.	.	.	.	.	.	.	.	.	.	.	10	85	95	98	88	100	100	4	.	3	.	3
176	4814541	JLM	40207	FMS	Rand	39195	Linn	Foresters	4	1	.	.	.	5	1	7	5	6	3	0	0	5	85	7	5	66	6	7	6	95	5	.	.	36	5	5	5	5	55	.	55	5	5	5	3	2	2	3	3
177	4815268	AGP	40273	FMS	Vol	38200	Linn	Foresters	3	1	.	.	.	5	6	5	4	4	0	0	3	.	.	.	.	.	.	.	.	.	2	2	12	2	2	2	2	.	.	.	.	.	.	.	1	2	2	2	2
178	4818249	JLM	40207	FMS	Rand	47189	Linn	Foresters	4	0	0	0	0	6	2	2	6	5	3	1	0	25	85	50	50	50	50	50	50	70	5	50	50	50	50	50	50	.	90	90	90	50	50	50	3	3	3	4	4
179	4818828	JLM	40207	FMS	Rand	28850	Linn	Rural Residential	.	0	.	.	.	.	.	.	.	.	-1	-1	3	96	50	5	5	5	0	0	8	5	95	15	.	10	5	10	12	90	17	36	50	0	5	5	3	3	3	.	2
180	4818981	JLM	40207	FMS	Rand	36879	Linn	Foresters	.	1	.	.	.	5	2	4	5	4	.	.	.	80	50	50	50	10	50	50	50	50	90	60	20	20	50	50	50	20	70	40	40	20	30	30	3	1	3	4	4
181	4819052	JLM	40207	FMS	Rand	46676	Linn	Foresters	7	0	3	0	0	1	2	2	2	2	3	0	0	3	97	6	3	3	5	3	6	95	3	16	15	25	3	3	3	95	83	83	83	4	4	4	5	4	5	5	5
182	4819204	KC	40204	FMS	Rand	46936	Linn	Foresters	2	0	0	0	0	6	3	2	4	5	2	0	2	17	75	35	16	25	47	54	63	35	95	5	5	5	5	5	13	.	.	.	.	.	.	.	4	3	-3	1	1
183	5504259	AGP	40217	FMS	Vol	36207	Linn	Multi-purpose Smallholders	3	0	2	0	0	6	2	2	6	6	3	2	0	.	.	.	.	.	.	.	.	.	.	.	.	.	.	.	.	.	.	.	.	.	.	.	4	1	3	1	0
184	5507704	AGP	40217	FMS	Vol	18943	Linn	Forested Estates	4	0	0	0	0	3	4	3	4	6	3	3	3	.	.	.	.	.	.	.	.	.	0	0	0	0	0	0	0	.	.	.	.	.	.	.	-1	-1	0	3	2
185	6401109	MNP	40298	FMS	Rand	86433	Lane	Multi-purpose Smallholders	3	0	2	1	0	5	2	2	4	3	0	-1	-2	65	55	35	65	75	15	45	45	35	.	.	.	.	.	.	.	45	35	65	75	40	65	65	3	3	2	1	2
186	6401521	JLM	40217	FMS	Vol	19651	Lane	Multi-purpose Smallholders	6	0	3	2	1	2	2	2	2	5	-1	-2	-3	.	.	.	.	.	.	.	.	.	.	.	.	.	.	.	.	.	.	.	.	.	.	.	4	-1	3	4	5
187	6402422	JLM	40217	FMS	Vol	21529	Lane	Rural Residential	6	1	.	.	.	6	1	5	6	5	1	2	1	100	16	0	0	0	0	0	0	0	30	10	10	10	0	0	0	100	5	5	4	0	0	0	5	4	5	3	4
188	6402773	KC	40213	FMS	Vol	21164	Lane	Multi-purpose Smallholders	5	1	.	.	.	6	4	4	6	4	3	-3	3	.	.	.	.	.	.	.	.	.	.	.	.	.	.	.	.	.	.	.	.	.	.	.	0	-5	-5	-3	-1
189	6403067	AGP	40213	FMS	Rand	23001	Lane	Multi-purpose Smallholders	3	1	.	.	.	1	5	5	1	4	0	2	2	85	95	5	15	25	2	12	12	35	5	55	55	75	2	2	12	5	33	33	55	2	2	32	2	1	1	1	3
190	6403952	AGP	40205	FMS	Rand	22908	Lane	Multi-purpose Smallholders	4	0	0	0	0	5	2	2	5	5	-1	0	-1	95	100	95	95	95	95	95	95	95	.	.	.	.	.	.	.	.	.	.	.	.	.	.	4	4	4	-4	3
191	6404255	AGP	40213	FMS	Rand	10430	Lane	Multi-purpose Smallholders	7	0	3	1	0	3	5	5	7	5	-1	0	-2	95	95	15	25	35	5	5	5	5	95	5	5	5	5	5	5	95	5	5	5	5	5	5	5	5	5	-5	1
192	6404540	AGP	40213	FMS	Rand	25795	Lane	Rural Residential	7	0	2	2	2	2	2	5	6	2	0	0	-1	15	12	5	15	45	0	0	0	2	.	12	12	52	12	15	65	.	.	.	.	.	.	.	4	4	4	-4	-3
193	6404554	AGP	40213	FMS	Rand	22800	Lane	Foresters	4	1	.	.	.	2	4	4	4	4	0	0	3	.	.	.	.	.	.	.	.	.	.	.	.	.	.	.	.	55	5	5	55	.	.	.	.	.	.	.	.
194	6411151	AGP	40217	FMS	Vol	82642	Lane	Rural Residential	5	0	.	.	.	4	5	5	4	4	-3	0	0	100	0	3	2	2	0	0	0	0	2	0	0	0	0	0	0	5	0	0	0	0	0	0	5	5	5	-1	5
195	6418711	AGP	40212	FMS	Rand	31442	Lane	Multi-purpose Smallholders	5	0	1	0	0	4	5	5	3	.	-1	1	-1	95	5	5	10	10	0	10	10	2	.	.	.	.	.	.	.	.	.	.	.	.	.	.	4	4	4	3	3
196	6419151	JLM	40205	FMS	Rand	71580	Lane	Rural Residential	3	0	.	3	.	.	.	5	.	.	.	.	.	.	.	.	.	.	.	.	.	.	.	.	.	.	.	.	.	.	.	.	.	.	.	.	.	.	.	.	.
197	6419505	AGP	40204	FMS	Rand	29291	Lane	Multi-purpose Smallholders	5	0	3	2	1	5	2	2	4	5	2	-2	-1	95	15	15	15	15	15	15	15	5	.	.	.	.	.	.	.	.	.	.	.	.	.	.	5	4	4	3	3
198	6419705	AGP	40213	FMS	Rand	20683	Lane	Rural Residential	7	1	.	.	.	3	5	4	4	5	0	-3	2	95	35	5	5	5	5	5	5	5	.	5	5	5	5	5	5	5	5	5	5	5	5	5	5	5	5	0	2
199	7101107	AGP	40267	FMS	Vol	22204	Linn	Multi-purpose Smallholders	3	1	.	.	.	7	4	2	5	5	2	-2	0	.	.	.	.	.	.	.	.	.	100	30	30	20	0	0	0	.	.	.	.	.	.	.	.	.	.	.	3
200	7101315	JLM	40214	FMS	Vol	40640	Linn	Foresters	2	0	0	2	2	5	2	2	4	5	-2	-2	-2	95	0	0	50	100	0	0	100	0	.	.	.	.	.	.	.	.	.	.	.	.	.	.	5	5	3	2	3
201	7101371	JLM	40217	FMS	Vol	40168	Linn	Farmers	6	0	0	0	0	5	2	2	5	6	1	1	1	.	.	.	.	.	.	.	.	.	.	.	.	.	.	.	.	.	.	.	.	.	.	.	5	5	5	4	4
202	7101544	KC	40204	FMS	Rand	23132	Linn	Rural Residential	2	0	3	2	1	4	5	3	2	2	3	-2	2	.	.	.	.	.	.	.	.	.	40	20	30	30	20	30	40	.	.	.	.	.	.	.	4	3	-2	2	-1
203	7101668	JLM	40207	FMS	Rand	36657	Linn	Rural Residential	6	0	.	2	1	5	2	6	4	5	3	2	3	36	100	5	7	15	6	5	35	92	7	93	37	76	7	8	22	14	24	35	37	8	9	12	4	3	3	5	4
204	7101688	JLM	40207	FMS	Rand	31289	Linn	Multi-purpose Smallholders	4	0	2	3	2	5	3	4	4	4	1	-2	-1	96	.	0	0	0	0	0	0	0	88	0	0	0	5	5	5	.	.	.	.	.	.	.	3	2	3	1	-1
205	7101705	KC	40211	FMS	Rand	21643	Linn	Rural Residential	5	0	.	.	3	.	.	5	.	.	1	-1	1	97	75	17	2	9	0	0	0	46	10	18	10	15	5	5	5	50	61	12	24	21	15	5	5	4	3	1	4
206	7101753	KC	40206	FMS	Rand	23410	Linn	Rural Residential	2	1	.	.	.	6	2	2	4	4	2	2	2	90	90	0	40	45	0	10	40	0	70	10	10	20	10	10	20	50	40	0	30	0	0	30	3	4	3	3	3
207	7101784	KC	40206	FMS	Rand	39112	Linn	Rural Residential	3	0	0	0	0	6	2	2	5	5	2	0	-1	95	15	5	5	5	5	5	5	5	.	.	.	.	.	.	.	.	.	.	.	.	.	.	3	3	3	0	2
208	7101867	KC	40206	FMS	Rand	12311	Linn	Rural Residential	4	0	3	2	2	5	3	2	5	6	0	-3	-1	.	.	.	.	.	.	.	.	.	.	.	.	.	.	.	.	.	.	.	.	.	.	.	5	4	.	4	4
209	7101965	KC	40203	FMS	Rand	24718	Linn	Rural Residential	5	0	0	2	0	4	2	3	4	4	3	0	-1	80	50	10	30	40	0	0	0	0	.	.	.	.	50	90	90	.	.	.	.	.	.	.	3	3	4	4	4
210	7102016	KC	40204	FMS	Rand	22985	Linn	Multi-purpose Smallholders	4	0	3	2	1	4	5	3	4	3	1	-1	1	.	.	.	.	.	.	.	.	.	.	.	.	.	.	.	.	.	.	.	.	.	.	.	5	3	4	3	4
211	7102018	KC	40206	FMS	Rand	38986	Linn	Forested Estates	.	0	.	.	.	.	.	.	.	.	1	-2	2	5	8	7	7	38	7	7	5	15	7	7	5	54	5	5	5	.	.	.	.	.	.	.	1	-1	-1	1	-2
212	7102022	KC	40206	FMS	Rand	47142	Linn	Multi-purpose Smallholders	6	0	3	3	3	5	4	3	5	5	2	1	1	.	.	.	.	.	.	.	.	.	83	35	45	65	5	5	5	35	5	22	53	5	7	54	3	1	2	-2	0
213	7102033	JLM	40204	FMS	Rand	22419	Linn	Farmers	4	0	2	2	2	6	1	4	7	4	0	0	3	20	0	0	0	0	0	0	0	0	0	0	0	0	0	0	0	50	0	0	0	0	0	0	4	3	0	0	0
214	7102041	KC	40206	FMS	Rand	38746	Linn	Rural Residential	3	0	3	.	2	2	2	3	5	4	-1	-3	-3	.	.	.	.	.	.	.	.	.	.	5	5	5	5	5	5	5	5	5	5	5	5	5	2	3	2	0	1
215	7102061	KC	40206	FMS	Rand	12308	Linn	Farmers	3	0	.	3	.	5	3	2	5	4	3	-2	3	33	15	25	42	100	12	44	43	15	63	24	22	62	22	34	71	31	31	21	61	14	22	82	0	0	2	1	2
216	7102162	KC	40206	FMS	Rand	38566	Linn	Rural Residential	3	0	0	0	0	5	3	3	5	5	1	2	3	52	4	3	2	51	2	2	2	2	.	.	.	.	.	.	.	.	.	.	.	.	.	.	4	2	1	1	1
217	7102183	KC	40206	FMS	Rand	46721	Linn	Farmers	3	0	0	2	0	5	5	4	4	6	3	2	3	5	100	5	5	5	5	5	5	100	100	5	5	5	3	3	3	.	.	.	.	.	.	.	4	3	3	4	3
218	7112936	KC	40206	FMS	Rand	35654	Linn	Rural Residential	4	0	.	2	.	2	2	3	2	3	-3	-3	3	0	0	1	1	1	1	1	1	1	.	.	.	.	.	.	.	.	.	.	.	.	.	.	5	4	4	-2	-4
219	7112941	KC	40206	FMS	Rand	33129	Linn	Multi-purpose Smallholders	4	0	.	2	.	4	2	5	1	1	-2	-2	0	100	0	0	0	0	0	0	0	0	.	.	.	.	.	.	.	.	.	.	.	.	.	.	5	5	5	.	.
220	7112998	JLM	40210	FMS	Rand	15082	Linn	Rural Residential	2	0	2	.	.	5	3	1	1	7	-3	-3	-1	.	.	.	.	.	.	.	.	.	.	.	.	.	.	.	.	.	5	7	6	.	7	6	4	1	1	.	.
221	7113100	JLM	40210	FMS	Rand	45917	Linn	Farmers	4	0	0	0	0	5	3	2	4	4	1	1	1	.	.	.	.	.	.	.	.	.	.	9	8	9	9	8	9	.	.	.	.	.	.	.	4	4	4	3	4
222	7113564	JLM	40210	FMS	Rand	18157	Linn	Rural Residential	4	0	3	3	2	4	4	3	5	4	-3	-3	-3	85	37	56	68	77	57	75	86	7	26	94	98	93	37	56	58	.	.	.	.	.	.	.	5	5	5	2	1
223	7113802	JLM	40210	FMS	Rand	25515	Linn	Multi-purpose Smallholders	6	0	3	2	1	6	1	2	6	5	3	-3	-3	94	4	85	85	66	3	5	5	7	.	.	.	.	.	.	.	.	.	.	.	.	.	.	4	3	4	2	1
224	7114028	JLM	40205	FMS	Rand	32173	Linn	Foresters	.	1	.	.	.	6	6	2	1	5	-2	0	3	15	15	5	5	5	5	5	5	5	15	10	5	5	5	5	5	15	5	5	5	5	5	5	5	5	5	3	2
225	7114078	AGP	40205	FMS	Rand	44521	Linn	Foresters	4	1	.	.	.	6	5	2	2	4	2	-2	1	55	25	15	5	5	5	15	5	15	15	5	15	5	5	5	5	35	5	5	5	5	5	5	3	4	4	3	2
226	7114201	KC	40204	FMS	Rand	32850	Linn	Multi-purpose Smallholders	3	0	2	2	0	5	3	2	4	4	3	-3	1	0	0	1	1	1	0	2	1	0	.	.	.	.	.	.	.	4	1	1	1	1	1	1	4	4	4	2	1
227	7114236	AGP	40205	FMS	Rand	36836	Linn	Foresters	3	0	0	0	0	5	2	3	4	5	1	1	-1	50	65	5	5	5	5	5	5	5	5	5	15	5	3	3	5	.	5	5	5	5	5	5	0	0	4	0	0
228	7114274	AGP	40205	FMS	Rand	23557	Linn	Farmers	.	0	2	1	0	3	5	5	3	3	-1	-1	-1	.	.	0	0	0	0	0	0	0	.	.	.	.	0	0	0	.	.	.	.	0	0	0	2	-1	.	.	.
229	7114308	JLM	40210	FMS	Rand	37975	Linn	Multi-purpose Smallholders	4	1	.	.	.	1	4	4	4	5	1	-3	1	0	0	0	0	0	0	0	0	0	.	.	.	.	.	.	.	.	.	.	.	.	.	.	0	-1	1	0	0
230	7114346	JLM	40205	FMS	Rand	30238	Linn	Multi-purpose Smallholders	4	0	3	2	0	2	3	5	2	2	-1	-1	-3	85	5	15	25	35	5	15	25	5	85	15	15	35	15	35	55	95	.	.	.	.	.	.	4	4	4	-1	1
231	7114527	JLM	40204	FMS	Rand	21370	Linn	Farmers	2	1	.	.	.	6	3	3	4	6	2	2	2	5	5	.	.	.	.	.	.	.	.	.	.	.	.	.	.	.	.	.	.	.	.	.	3	2	.	.	.
232	7114922	AGP	40205	FMS	Rand	46461	Linn	Farmers	4	0	2	2	0	6	2	1	4	6	1	0	0	.	.	.	.	.	.	.	.	.	.	.	.	.	.	.	.	.	.	.	.	.	.	.	5	4	4	3	3
233	7115172	KC	40204	FMS	Rand	25119	Linn	Rural Residential	5	0	0	0	0	6	2	3	3	3	3	1	2	55	48	21	28	58	48	54	59	59	33	35	45	52	8	19	29	.	.	.	.	.	.	.	4	3	3	3	4
234	7115185	JLM	40210	FMS	Rand	46508	Linn	Rural Residential	4	1	.	.	.	5	3	3	3	5	3	0	2	96	0	0	0	0	0	0	0	0	78	25	24	25	6	7	7	.	.	.	.	.	.	.	4	4	3	3	4
235	7701077	JLM	40217	FMS	NonVol	86347	Lane	Multi-purpose Smallholders	5	0	3	2	1	5	2	2	5	5	2	-2	-2	45	5	25	35	35	5	5	5	5	.	.	.	.	.	.	.	35	15	25	35	5	5	5	4	4	-3	-4	-2
236	7701079	JLM	40214	FMS	Vol	86273	Lane	Farmers	6	0	3	2	1	2	2	2	6	3	-1	-3	-3	97	5	57	75	85	.	.	.	.	.	.	.	.	.	.	.	13	14	34	47	13	36	64	4	5	4	2	2
237	7701105	AGP	40214	FMS	NonVol	25813	Lane	Multi-purpose Smallholders	5	0	2	1	0	5	1	4	5	2	0	-3	-1	35	15	15	15	15	15	15	15	5	.	.	.	.	.	.	.	.	.	.	.	.	.	.	5	3	0	1	1
238	7701145	AGP	40214	FMS	Vol	20672	Lane	Multi-purpose Smallholders	6	0	3	2	0	6	1	1	6	5	3	-1	-1	80	0	0	0	0	0	0	0	0	100	0	0	0	0	0	0	100	0	0	0	0	0	0	3	3	3	-1	4
239	7701188	AGP	40217	FMS	Rand	19206	Lane	Multi-purpose Smallholders	6	0	.	.	2	5	2	2	3	5	1	-2	-1	.	.	.	.	.	.	.	.	.	.	.	.	.	.	.	.	.	.	.	.	.	.	.	3	3	3	3	3
240	7701272	JLM	40212	FMS	Rand	87047	Lane	Rural Residential	4	0	3	2	1	5	4	3	5	5	0	-1	1	95	15	5	5	5	5	5	5	5	95	15	13	12	5	7	7	93	5	15	15	5	5	5	5	5	5	4	4
241	7701384	AGP	40206	FMS	Rand	87084	Lane	Rural Residential	4	0	2	2	2	3	6	2	5	4	0	0	0	5	0	2	5	5	5	5	5	5	5	5	5	5	5	5	5	5	5	5	5	5	5	5	0	0	0	1	1
242	7701394	7701394	40210	FMS	Rand	80235	Lane	Rural Residential	5	0	3	3	0	6	2	3	5	5	-3	0	-3	80	0	50	70	70	30	70	70	0	.	.	.	.	.	.	.	70	20	30	30	20	40	50	5	3	3	-4	-3
243	7701505	JLM	40212	FMS	Rand	86729	Lane	Rural Residential	5	0	.	.	2	5	2	2	4	3	3	-1	1	98	3	2	48	98	2	48	98	3	.	.	.	.	.	.	.	.	.	.	.	.	.	.	5	5	5	-2	4
244	7701613	JLM	40212	FMS	Rand	8985	Lane	Farmers	5	0	3	3	2	5	2	2	5	5	1	-2	-2	100	0	.	.	.	.	.	.	.	.	.	.	.	.	.	.	.	.	.	.	.	.	.	4	4	4	.	.
245	7701633	JLM	40212	FMS	Rand	85892	Lane	Multi-purpose Smallholders	4	0	3	2	0	4	5	2	5	5	-2	-1	0	85	5	7	6	6	6	6	6	5	.	.	.	.	.	.	.	.	.	.	.	.	.	.	4	4	4	-2	-2
246	7701658	JLM	40212	FMS	Rand	87147	Lane	Rural Residential	1	1	.	.	.	4	4	4	1	4	3	0	3	70	30	0	0	0	0	0	0	0	20	0	0	0	0	0	0	.	.	.	.	.	.	.	3	3	3	0	3
247	7701753	AGP	40206	FMS	Rand	79789	Lane	Rural Residential	3	0	2	1	0	3	4	3	5	3	3	2	-2	.	.	.	.	.	.	.	.	.	.	.	.	.	.	.	.	10	90	20	60	0	10	20	4	3	3	0	-2
248	7701795	JLM	40212	FMS	Rand	17220	Lane	Foresters	4	1	.	.	.	5	2	3	5	6	3	0	2	.	.	.	.	.	.	.	.	.	25	86	88	87	6	8	15	.	.	.	.	.	.	.	4	4	4	4	4
249	7701829	JLM	40205	FMS	Rand	21534	Lane	Rural Residential	5	0	0	0	0	5	3	5	4	3	1	1	3	76	24	25	55	0	0	0	0	0	.	.	.	.	.	.	.	.	.	.	.	.	.	.	5	5	5	2	3
250	7701913	JLM	40212	FMS	Rand	86983	Lane	Rural Residential	7	0	0	0	0	2	3	6	3	3	.	.	.	.	.	.	.	.	.	.	.	.	.	.	.	.	.	.	.	.	.	.	.	.	.	.	.	.	.	.	.
251	7701965	AGP	40210	FMS	Rand	21076	Lane	Rural Residential	5	0	0	0	0	5	.	2	4	3	-3	-2	-3	.	.	.	.	.	.	.	.	.	.	.	.	.	.	.	.	.	5	0	0	0	0	0	4	4	5	5	.
252	7701996	JLM	40212	FMS	Rand	86546	Lane	Rural Residential	6	0	.	3	1	5	7	.	4	5	3	-3	-3	80	0	0	0	0	0	0	0	0	.	.	.	.	.	.	.	.	0	0	70	0	0	.	4	3	-3	-5	-3
253	7702036	JLM	40212	FMS	Rand	86944	Lane	Rural Residential	.	0	.	2	.	4	4	4	4	4	0	0	0	.	25	.	.	.	.	.	.	8	.	.	.	.	.	.	.	17	.	.	.	.	.	.	.	.	.	-2	.
254	7711009	KC	40213	FMS	Vol	79865	Lane	Multi-purpose Smallholders	4	0	0	0	0	5	3	3	6	4	-1	-1	3	75	15	47	65	65	65	65	62	65	.	32	35	35	35	35	35	.	15	15	15	15	15	15	5	4	5	-1	4
255	7711736	JLM	40214	FMS	Vol	86398	Lane	Rural Residential	7	0	0	0	0	4	2	2	4	2	0	-2	-2	0	50	10	20	0	10	20	0	0	5	0	0	0	0	0	0	.	0	0	0	0	0	0	4	4	3	3	4
256	7711981	KC	40213	FMS	Vol	85736	Lane	Multi-purpose Smallholders	4	0	.	3	.	4	1	7	6	7	-1	-2	-1	79	0	35	35	35	35	35	35	0	.	.	.	.	.	.	.	100	0	0	0	0	0	0	5	5	5	3	1
257	7714872	JLM	40212	FMS	Rand	85857	Lane	Rural Residential	4	0	3	2	1	5	3	3	5	4	-1	-1	-1	85	0	0	0	0	0	0	0	0	100	0	0	0	0	0	0	0	0	0	0	0	0	0	5	-1	4	-1	2
258	7716143	JLM	40205	FMS	Rand	79797	Lane	Multi-purpose Smallholders	4	0	3	.	.	6	1	1	4	3	0	0	-1	95	0	0	0	0	0	0	0	0	95	.	.	.	0	0	0	.	.	.	.	.	.	.	5	5	5	-5	3
259	7716831	AGP	40212	FMS	Rand	79513	Lane	Multi-purpose Smallholders	4	0	0	0	0	1	2	4	4	2	0	0	0	8	5	5	45	75	5	5	15	25	.	.	.	.	.	.	.	85	5	5	5	5	5	5	5	5	5	-5	0
260	7717547	AGP	40212	FMS	Rand	78771	Lane	Multi-purpose Smallholders	6	0	3	3	2	6	3	2	4	6	2	.	2	.	.	.	.	.	.	.	.	.	.	.	.	.	.	.	.	.	.	.	.	.	.	.	5	4	4	2	1
261	7717603	AGP	40212	FMS	Rand	80456	Lane	Multi-purpose Smallholders	5	0	3	2	1	3	5	3	3	5	1	-3	2	70	0	10	0	0	0	0	0	0	.	.	.	.	.	.	.	100	0	0	0	0	0	0	4	3	4	1	3
262	7718040	AGP	40212	FMS	Rand	74213	Lane	Farmers	6	0	3	2	1	5	2	2	5	4	-1	-2	-1	.	.	.	.	.	.	.	.	.	.	.	.	.	.	.	.	.	.	.	.	.	.	.	3	3	3	2	4
263	7718698	JLM	40204	FMS	Rand	28305	Lane	Multi-purpose Smallholders	5	0	3	3	2	3	2	2	5	3	.	.	.	100	0	0	0	0	0	0	0	0	100	0	0	0	0	0	0	100	0	0	0	0	0	0	5	5	4	-3	3
264	7718856	AGP	40212	FMS	Rand	79690	Lane	Multi-purpose Smallholders	6	0	0	0	0	5	3	2	5	6	0	-1	3	5	0	0	0	0	0	0	0	0	55	2	2	2	.	.	.	.	2	2	2	2	2	2	3	3	0	0	.
265	7719128	KC	40203	FMS	Rand	22038	Lane	Multi-purpose Smallholders	4	0	1	0	0	5	1	1	4	4	1	-3	-3	100	0	0	0	0	0	0	0	0	.	.	.	.	.	.	.	.	.	.	.	.	.	.	5	4	4	3	1
266	7719269	AGP	40212	FMS	Rand	21248	Lane	Multi-purpose Smallholders	3	0	2	2	1	2	3	2	5	3	-2	-3	-3	.	.	.	.	.	.	.	.	.	.	.	.	.	.	.	.	.	.	.	.	.	.	.	4	4	4	0	3
267	8101387	AGP	40274	FMS	LMS	8706	Lane	Multi-purpose Smallholders	2	1	.	.	.	6	2	2	5	5	-1	2	1	85	5	55	55	55	45	25	25	15	.	.	.	.	.	.	.	5	5	5	5	5	.	.	4	3	3	1	3
268	8101733	AGP	40212	FMS	Rand	20964	Lane	Rural Residential	6	0	.	.	3	2	1	2	5	1	1	-2	-1	5	95	5	25	45	5	25	10	12	95	25	25	55	5	95	95	55	5	25	95	5	5	95	4	4	4	.	3
269	8101950	AGP	40212	FMS	Rand	18837	Lane	Rural Residential	5	0	0	3	2	7	2	2	6	2	2	-1	-1	55	25	15	25	35	15	15	25	5	35	15	25	35	12	18	38	.	.	.	.	.	.	.	3	2	3	3	3
270	8102172	AGP	40212	FMS	Rand	21979	Lane	Rural Residential	4	1	.	.	.	6	3	1	3	6	1	0	1	25	25	25	25	2	2	2	2	100	25	35	5	5	5	5	5	.	.	.	.	.	.	.	4	3	-1	-1	-1
271	8102380	JLM	40204	FMS	Rand	26026	Lane	Rural Residential	4	0	1	1	0	2	5	5	1	3	2	-1	0	85	17	6	26	96	3	23	79	4	.	.	.	.	.	.	.	73	24	73	97	6	26	75	3	3	3	-1	1
272	8102932	AGP	40204	FMS	Rand	68329	Lane	Rural Residential	5	0	3	2	1	6	4	3	5	3	-3	-3	-2	95	5	5	15	25	5	15	25	5	.	.	.	.	15	25	35	.	.	.	.	.	.	.	5	5	5	.	.
273	8102960	AGP	40206	FMS	Rand	20111	Lane	Rural Residential	4	0	2	2	0	6	3	1	7	7	-3	1	3	65	5	5	5	5	5	5	5	25	15	5	5	5	5	5	5	.	.	.	.	.	.	.	3	3	3	2	2
274	8103237	AGP	40212	FMS	Rand	26619	Lane	Rural Residential	.	0	3	3	3	4	3	3	4	4	1	1	2	95	15	5	5	5	5	5	5	5	95	5	5	5	5	5	5	.	5	5	5	5	5	5	4	4	5	1	4
275	8103960	AGP	40212	FMS	Rand	86665	Lane	Rural Residential	4	1	.	.	.	6	3	1	4	5	-1	-1	3	.	5	.	.	.	.	.	.	.	.	.	.	.	.	.	.	.	.	.	.	.	.	.	3	4	5	1	4
276	8103975	AGP	40205	FMS	Rand	84835	Lane	Rural Residential	2	0	0	0	0	1	3	7	2	1	-2	0	1	.	.	.	.	.	.	.	.	.	.	.	.	.	.	.	.	.	.	.	.	.	.	.	5	4	5	1	5
277	8111066	KC	40213	FMS	LMS	82241	Lane	Rural Residential	6	0	3	3	2	5	3	5	6	4	1	1	-1	.	0	0	0	0	0	0	0	0	.	.	.	.	.	.	.	.	.	.	.	.	.	.	3	3	3	3	2
278	8111899	AGP	40273	FMS	LMS	85704	Lane	Multi-purpose Smallholders	5	0	1	2	4	5	2	5	4	4	1	-2	-2	95	5	5	5	5	5	5	5	95	25	5	5	5	5	5	5	.	.	.	.	.	.	.	5	4	4	-2	1
279	8116902	JLM	40217	FMS	Vol	9002	Lane	Multi-purpose Smallholders	6	0	3	3	2	5	3	3	5	5	-1	-2	-1	.	.	.	.	.	.	.	.	.	.	.	.	.	.	.	.	.	.	.	.	.	.	.	5	5	5	5	5
280	8118566	JLM	40214	FMS	Vol	9634	Lane	Rural Residential	4	0	2	1	0	7	2	2	2	5	-3	-3	-3	.	.	.	.	.	.	.	.	.	.	.	.	.	.	.	.	.	.	.	.	.	.	.	5	5	5	-1	5
281	8119307	AGP	40212	FMS	Rand	83700	Lane	Rural Residential	4	0	2	2	0	5	4	2	4	4	-1	1	-1	.	.	.	.	.	.	.	.	.	.	.	.	.	.	.	.	.	.	.	.	.	.	.	4	4	0	0	.
282	8119431	AGP	40212	FMS	Rand	76511	Lane	Forested Estates	6	0	0	2	0	6	2	2	5	6	2	-3	-3	2	98	95	95	95	95	98	98	5	5	98	98	98	98	98	98	.	.	.	.	.	.	.	5	4	3	2	2
283	8302723	JLM	40217	FMS	Vol	9495	Lane	Farmers	2	0	3	2	0	5	3	3	1	4	3	3	3	.	.	.	.	.	.	.	.	.	.	.	.	.	.	.	.	.	.	.	.	.	.	.	5	2	2	1	2
284	8306599	AGP	40217	FMS	NonVol	84243	Lane	Farmers	4	0	1	1	1	5	3	3	3	4	0	0	-2	.	.	.	.	.	.	.	.	.	.	.	.	.	.	.	.	.	.	.	.	.	.	.	1	.	3	-1	2
285	8307239	AGP	40213	FMS	Rand	20817	Lane	Foresters	6	0	2	2	2	5	4	4	4	4	2	-2	-2	20	10	0	0	0	0	0	0	20	15	.	.	15	5	.	.	20	30	.	.	.	.	.	0	0	2	0	3
286	8307323	AGP	40213	FMS	Rand	21316	Lane	Farmers	5	1	.	.	.	5	2	2	4	5	3	1	3	.	.	.	.	.	.	.	.	.	.	.	.	.	.	.	.	72	25	25	25	8	8	8	3	3	3	1	2
287	8307585	JLM	40205	FMS	Rand	86957	Lane	Forested Estates	5	1	.	.	.	2	1	1	1	5	3	1	3	25	95	5	6	6	5	5	5	76	25	5	15	85	5	15	25	5	5	5	45	15	15	35	1	-3	-3	3	5
288	8307762	JLM	40214	FMS	Rand	24857	Lane	Rural Residential	3	0	3	2	0	4	3	3	5	4	2	0	-1	.	.	.	.	.	.	.	.	.	50	40	60	90	.	.	.	.	.	.	.	.	.	.	2	.	.	.	2
289	8307909	JLM	40214	FMS	Rand	18681	Lane	Rural Residential	4	1	.	.	.	5	3	3	6	5	3	-1	1	.	.	.	.	.	.	.	.	.	15	65	45	45	.	.	.	.	.	.	.	.	.	.	0	0	0	.	3
290	8308461	JLM	40214	FMS	Rand	10200	Lane	Foresters	.	0	0	0	0	5	3	2	5	6	1	-2	-1	100	0	0	.	.	.	.	.	.	.	.	.	.	.	.	.	.	.	.	.	.	.	.	5	5	5	.	.
292	8308958	KC	40203	FMS	Rand	86898	Lane	Forested Estates	2	1	.	.	.	6	3	3	5	6	2	1	3	12	5	5	11	22	5	5	5	2	70	5	5	25	15	35	0	34	11	11	25	.	.	.	.	.	2	.	3
293	8309946	JLM	40214	FMS	Rand	26177	Lane	Foresters	3	0	2	1	0	7	2	2	7	4	1	0	1	57	95	6	50	76	5	46	77	10	85	75	50	100	0	0	50	50	0	0	50	0	0	50	3	3	3	3	3
294	8311817	JLM	40217	FMS	Vol	21683	Lane	Foresters	3	0	2	0	0	5	3	6	5	7	0	0	0	27	55	5	5	5	5	5	5	85	5	35	45	45	5	5	5	5	95	35	35	5	5	5	3	3	1	3	4
295	8317008	JLM	40214	FMS	Rand	12503	Lane	Foresters	5	0	.	3	2	5	5	3	4	6	-2	-3	-2	35	90	50	50	50	50	50	50	0	98	.	.	.	5	5	5	.	45	45	45	5	5	5	5	3	4	-2	-1
296	8319409	JLM	40214	FMS	Rand	13076	Lane	Farmers	4	1	.	.	.	6	3	2	4	5	-2	-2	-3	45	85	85	85	85	15	15	15	15	95	55	55	75	5	5	5	85	55	65	85	5	5	5	5	2	5	3	4
297	8319445	AGP	40205	FMS	Rand	21616	Lane	Foresters	.	0	3	.	.	5	4	4	5	4	1	1	0	85	25	0	0	0	0	0	0	0	90	50	50	50	0	0	0	50	50	50	60	0	0	0	4	2	4	4	4
298	8319654	JLM	40214	FMS	Rand	85816	Lane	Foresters	7	0	.	3	2	1	2	2	4	.	.	.	.	55	35	5	5	5	5	5	5	5	.	.	.	.	5	5	5	55	.	.	.	5	5	75	5	4	3	-3	0
299	9001626	AGP	40268	FMS	Vol	46893	Linn	Rural Residential	5	0	3	3	3	4	2	3	5	4	1	0	0	70	80	0	0	0	0	0	0	.	10	0	20	90	0	0	0	.	10	10	90	0	0	0	5	5	5	5	5
300	9002141	AGP	40217	FMS	Vol	33840	Linn	Foresters	.	0	0	0	0	5	1	6	5	5	3	3	-1	5	95	5	5	5	5	5	5	55	95	95	5	95	5	5	5	5	95	95	95	5	5	5	0	-1	.	0	1
301	9002880	JLM	40210	FMS	Rand	29753	Linn	Farmers	.	0	3	0	0	6	1	4	5	6	3	2	2	.	.	.	.	.	.	.	.	.	.	.	.	.	.	.	.	.	.	.	.	.	.	.	2	3	3	2	1
302	9003008	JLM	40210	FMS	Rand	36504	Linn	Foresters	5	0	3	3	3	3	5	2	1	3	3	2	2	16	.	6	7	7	6	7	17	86	16	86	87	86	6	8	7	16	85	83	96	5	7	6	0	-1	1	3	2
303	9003045	KC	40204	FMS	Rand	37761	Linn	Farmers	2	1	.	.	.	4	3	5	3	4	3	3	3	100	0	0	0	0	0	0	0	0	.	.	.	.	.	.	.	.	.	.	.	.	.	.	3	3	2	3	3
304	9003195	AGP	40204	FMS	Rand	23610	Linn	Farmers	5	1	.	.	.	5	4	4	1	4	1	1	3	.	.	.	.	.	.	.	.	.	.	.	.	.	.	.	.	.	.	.	.	.	.	.	0	-1	0	0	0
305	9003540	KC	40204	FMS	Rand	22838	Linn	Farmers	.	0	.	.	.	6	.	.	.	.	.	.	.	.	.	.	.	.	.	.	.	.	.	.	.	.	.	.	.	.	.	.	.	.	.	.	.	.	.	.	.
306	9003560	JLM	40210	FMS	Rand	38286	Linn	Farmers	4	0	.	1	.	6	2	5	4	6	3	1	1	7	5	5	5	54	2	4	55	46	.	.	.	.	.	.	.	.	.	.	.	.	.	.	3	3	3	0	1
307	9003864	JLM	40210	FMS	Rand	12306	Linn	Multi-purpose Smallholders	3	1	.	.	.	5	5	.	.	.	1	.	.	.	.	.	.	.	.	.	.	.	.	.	.	.	.	.	.	.	.	.	.	.	.	.	.	.	.	.	.
308	9004075	JLM	40210	FMS	Rand	35545	Linn	Multi-purpose Smallholders	4	0	3	2	0	6	1	1	5	5	2	1	1	88	98	0	0	45	6	7	14	25	.	.	.	.	.	.	.	13	15	15	93	4	4	75	3	3	3	3	3
309	9004156	JLM	40210	FMS	Rand	26938	Linn	Rural Residential	4	0	2	1	0	5	4	5	4	4	0	0	1	.	.	.	.	.	.	.	.	.	.	.	.	.	.	.	.	100	0	0	0	0	0	0	4	3	4	4	2
310	9004409	JLM	40210	FMS	Rand	19886	Linn	Farmers	4	0	2	2	2	6	7	3	4	4	1	0	-1	0	0	0	0	0	0	0	0	0	.	.	.	.	.	.	.	.	.	.	.	.	.	.	2	3	1	2	2
311	9004477	JLM	40210	FMS	Rand	15183	Linn	Farmers	2	1	.	.	.	7	1	1	7	7	3	3	3	95	0	6	6	6	6	6	5	7	.	.	.	.	.	.	.	.	.	.	.	.	.	.	5	5	5	5	5
312	9004583	AGP	40206	FMS	NonVol	34587	Linn	Forested Estates	.	0	.	.	.	.	.	.	.	.	.	.	.	.	.	.	.	.	.	.	.	.	.	.	.	.	.	.	.	.	.	.	.	.	.	.	.	.	.	.	.
313	9004605	KC	40203	FMS	Rand	37612	Linn	Foresters	6	0	0	0	0	5	3	2	6	2	3	3	-3	18	8	8	25	22	9	14	23	12	9	5	9	27	5	9	7	5	5	5	5	7	7	7	4	4	4	4	4
314	9004751	JLM	40210	FMS	Rand	36254	Linn	Rural Residential	5	0	.	.	2	5	2	3	5	6	-1	-2	3	25	5	15	13	6	4	4	3	4	100	5	5	5	5	5	5	65	5	5	5	5	5	5	4	4	4	3	3
315	9012524	AGP	40269	FMS	Vol	46981	Linn	Farmers	5	0	2	.	.	3	2	2	5	5	2	1	2	20	50	50	50	50	50	50	50	20	.	.	.	.	.	.	.	.	.	.	.	.	.	.	4	2	2	2	2
316	9013433	AGP	40266	FMS	Vol	16012	Linn	Farmers	5	0	1	1	2	3	2	5	3	2	2	-1	-3	50	80	10	10	50	10	10	30	10	15	80	80	100	30	40	60	15	75	85	95	15	15	55	3	1	3	2	2
317	9013572	JLM	40205	FMS	Rand	33518	Linn	Farmers	6	1	.	.	.	7	1	4	7	4	0	-1	3	95	85	15	75	85	0	45	45	25	45	25	35	25	15	15	25	.	25	15	45	5	15	25	5	4	5	5	5
318	9013707	JLM	40204	FMS	Rand	29710	Linn	Multi-purpose Smallholders	6	0	0	0	0	5	5	5	5	5	3	-2	3	12	0	0	0	0	0	0	0	0	.	.	.	.	.	.	.	.	.	.	.	.	.	.	4	4	4	2	2
319	9013791	JLM	40205	FMS	Rand	45696	Linn	Farmers	7	0	0	0	0	.	1	1	.	.	3	3	3	.	.	.	.	.	.	.	.	.	30	.	.	.	.	.	.	.	.	.	.	.	.	.	.	0	0	0	0
320	9013862	AGP	40206	FMS	Rand	23775	Linn	Multi-purpose Smallholders	3	0	3	2	.	3	4	5	5	1	2	-2	-3	5	5	0	12	56	5	15	57	5	.	.	.	.	.	.	.	95	5	55	85	5	25	92	3	2	3	-1	3
321	9013996	AGP	40205	FMS	Rand	36615	Linn	Farmers	4	0	1	0	0	6	4	6	4	6	2	-1	3	20	90	0	0	0	0	0	0	10	20	50	0	0	0	0	0	.	.	.	.	.	.	.	3	2	2	3	2
322	9014206	JLM	40210	FMS	Rand	15083	Linn	Multi-purpose Smallholders	4	1	.	.	.	5	2	4	5	3	3	2	-2	50	50	70	70	60	60	50	50	30	.	.	.	.	.	.	.	.	.	.	.	.	.	.	4	3	3	3	1
323	9014247	JLM	40210	FMS	Rand	11726	Linn	Farmers	5	0	2	.	.	5	3	3	5	2	1	2	3	89	8	6	8	8	5	6	5	7	.	.	.	.	.	.	.	.	.	.	.	.	.	.	4	4	4	0	4
324	9014532	AGP	40206	FMS	Rand	36209	Linn	Foresters	.	1	.	.	.	7	2	1	6	7	3	-1	3	95	95	95	95	95	95	95	95	5	95	5	5	5	5	5	35	55	95	95	95	35	35	35	4	4	4	4	4
325	9014834	JLM	40210	FMS	Rand	36276	Linn	Foresters	6	0	3	2	2	4	7	6	7	4	0	-1	3	100	5	5	5	5	5	5	5	5	100	5	5	5	5	5	5	100	5	5	5	5	5	3	1	2	3	-5	0
326	9015121	JLM	40210	FMS	Rand	35408	Linn	Rural Residential	4	0	2	2	0	5	5	5	5	2	2	-2	-1	94	83	4	3	33	4	3	32	45	85	22	3	35	3	3	22	.	7	5	5	3	2	30	4	4	5	3	4
327	9015306	JLM	40210	FMS	Rand	46045	Linn	Rural Residential	3	0	0	2	1	5	3	3	4	7	1	-1	-1	94	6	8	37	37	8	37	35	10	98	6	6	8	7	8	8	.	.	.	.	.	.	.	4	3	3	3	0
328	9015383	AGP	40266	FMS	Rand	46698	Linn	Rural Residential	4	0	4	1	2	5	5	4	3	5	-2	-3	0	92	5	5	5	5	5	5	5	5	100	5	5	5	5	5	5	.	.	.	.	.	.	.	-5	4	4	1	3
329	9201044	JLM	40214	FMS	Vol	16389	Linn	Multi-purpose Smallholders	.	0	2	1	0	5	3	3	4	3	1	0	-1	60	70	70	33	63	14	28	64	25	.	.	.	.	.	.	.	.	.	.	.	.	.	.	2	3	3	4	3
330	9201154	AGP	40269	FMS	Vol	23646	Linn	Farmers	5	0	2	3	3	6	2	2	4	5	.	-1	-1	.	.	.	.	.	.	.	.	.	.	.	.	.	.	.	.	.	.	.	.	.	.	.	3	3	3	4	2
331	9201266	JLM	40204	FMS	Rand	35956	Linn	Rural Residential	.	0	0	0	0	4	1	4	4	4	1	0	2	15	22	13	22	21	12	12	12	7	.	.	.	.	.	.	.	22	32	38	42	6	8	12	-1	1	2	3	2
332	9201393	AGP	40206	FMS	Rand	34842	Linn	Rural Residential	4	1	.	.	.	6	2	3	4	6	3	0	3	5	5	5	5	5	5	5	5	5	.	.	.	.	.	.	.	.	.	.	.	.	.	.	4	1	0	0	3
333	9201427	AGP	40205	FMS	Rand	46999	Linn	Foresters	4	0	2	0	0	5	3	3	5	5	3	0	2	.	.	.	.	.	.	.	.	.	.	.	.	.	.	.	.	.	.	.	.	.	.	.	3	1	0	0	0
334	9201472	JLM	40210	FMS	Rand	37907	Linn	Rural Residential	6	0	2	2	2	5	2	2	5	5	1	0	1	.	.	.	.	.	.	.	.	.	.	.	.	.	.	.	.	.	.	.	.	5	6	6	3	1	3	.	3
335	9201474	JLM	40210	FMS	Rand	30943	Linn	Rural Residential	4	1	.	.	.	6	6	2	2	4	-3	-3	1	96	6	0	0	0	0	0	0	0	.	.	.	.	.	.	.	5	4	6	6	5	6	6	4	4	4	2	3
336	9201541	AGP	40205	FMS	Rand	38109	Linn	Rural Residential	6	0	0	0	0	4	3	2	3	4	0	1	-1	5	5	5	5	5	5	5	5	5	95	5	5	5	5	5	5	95	8	5	5	5	5	5	3	3	3	3	3
337	9201576	JLM	40210	FMS	Rand	35416	Linn	Rural Residential	4	0	3	2	2	6	3	1	.	3	1	1	-1	100	0	0	20	30	0	20	30	0	.	.	.	.	.	.	.	.	.	.	.	.	.	.	5	5	5	2	3
338	9201652	KC	40204	FMS	Rand	37142	Linn	Rural Residential	.	0	0	0	0	5	5	5	5	5	0	0	3	100	0	.	.	.	.	.	.	.	.	.	.	.	.	.	.	.	.	.	.	.	.	.	4	4	4	.	.
339	9201711	JLM	40210	FMS	Rand	46144	Linn	Rural Residential	3	1	.	.	.	4	5	6	3	6	-3	3	2	.	.	.	.	.	.	.	.	.	.	.	.	.	.	.	.	85	10	10	10	.	.	.	3	.	.	.	.
340	9201750	JLM	40210	FMS	Rand	33982	Linn	Rural Residential	6	0	3	3	3	3	3	3	4	4	3	3	0	65	.	25	75	55	.	.	.	.	95	15	45	67	.	.	.	68	.	.	.	.	.	.	3	1	4	0	0
341	9201848	JLM	40210	FMS	Rand	39936	Linn	Rural Residential	.	0	1	0	0	6	5	4	4	4	-2	0	3	93	0	0	0	0	0	0	0	0	.	.	.	.	.	.	.	.	.	.	.	.	.	.	2	1	2	2	2
342	9201890	JLM	40210	FMS	Rand	37349	Linn	Rural Residential	5	0	2	2	2	5	1	6	4	3	0	-2	0	85	0	5	5	5	5	5	5	5	.	.	.	.	.	.	.	98	6	5	5	.	.	.	5	5	5	0	5
343	9201926	JLM	40210	FMS	Rand	38027	Linn	Rural Residential	4	1	.	.	.	6	5	2	4	5	-1	-1	-1	53	35	5	4	4	4	4	4	34	25	35	55	65	5	5	5	12	5	5	5	5	5	5	3	4	4	-3	2
344	9201965	AGP	40205	FMS	Rand	37490	Linn	Foresters	4	0	2	2	2	2	3	4	4	5	.	.	.	.	.	.	.	.	.	.	.	.	.	.	.	.	.	.	.	.	.	.	.	.	.	.	5	2	3	-5	1
345	9202091	AGP	40206	FMS	Rand	47079	Linn	Rural Residential	2	1	.	.	.	7	4	1	4	4	0	0	0	100	100	0	0	0	0	0	0	0	.	5	5	5	5	5	5	.	3	3	3	2	2	2	2	-3	-2	-5	0
346	9202213	AGP	40206	FMS	Rand	40257	Linn	Rural Residential	4	0	3	2	0	5	1	4	4	4	0	1	1	95	100	5	5	55	5	5	5	5	100	5	5	5	5	5	5	5	5	5	5	5	5	5	5	3	3	-4	0
347	9211182	AGP	40274	FMS	Vol	46432	Linn	Multi-purpose Smallholders	3	1	.	.	.	6	3	3	1	5	1	1	3	95	95	0	0	0	0	0	0	0	85	0	0	0	0	0	0	0	0	0	0	0	0	0	-1	-2	1	3	3
348	9211484	AGP	40267	FMS	Vol	35371	Linn	Rural Residential	4	1	.	.	.	5	.	3	3	5	3	2	3	.	.	.	.	.	.	.	.	.	5	8	5	5	5	5	5	.	5	5	5	5	5	5	1	0	0	2	0
349	9211871	AGP	40266	FMS	Vol	45861	Linn	Farmers	5	0	.	1	2	2	5	2	4	3	1	-1	-1	.	.	.	.	.	.	.	.	.	.	.	.	.	.	.	.	.	.	.	.	.	.	.	4	4	4	4	4
350	9211964	AGP	40269	FMS	Vol	39584	Linn	Rural Residential	6	0	.	.	1	6	2	2	6	4	0	-2	-2	95	15	25	35	85	25	75	85	5	.	.	.	.	.	.	.	.	.	.	.	.	.	.	5	5	5	5	4
351	9212283	AGP	40206	FMS	Rand	37030	Linn	Rural Residential	.	0	2	3	2	5	5	7	5	5	1	-3	3	0	0	0	10	10	0	10	30	0	0	0	10	30	0	20	20	.	0	10	20	0	0	20	2	1	2	-3	2
353	9212555	AGP	40206	FMS	Rand	39505	Linn	Rural Residential	5	0	.	0	0	5	2	3	5	4	2	2	2	95	15	12	32	45	5	15	55	15	.	.	.	.	.	.	.	.	.	.	.	.	.	.	4	4	4	4	4
354	9212644	AGP	40206	FMS	Rand	35622	Linn	Rural Residential	5	0	0	0	0	4	3	3	6	3	1	-2	2	50	90	.	.	.	.	.	.	.	30	60	.	.	.	.	.	.	.	.	.	.	.	.	4	4	4	3	4
355	9212722	JLM	40205	FMS	Rand	39909	Linn	Rural Residential	3	0	.	.	2	5	.	2	6	6	3	-3	0	.	.	0	0	0	0	0	0	0	.	.	.	.	0	0	0	.	.	.	.	0	0	0	4	3	4	1	-2
356	9212844	AGP	40206	FMS	Rand	24429	Linn	Rural Residential	4	0	3	2	1	5	3	3	4	3	1	0	-1	5	5	.	.	.	.	.	.	.	.	.	.	.	.	.	.	.	.	.	.	.	.	.	3	1	4	2	3
357	9213084	AGP	40206	FMS	Rand	25905	Linn	Rural Residential	4	0	2	.	.	5	6	3	4	3	2	1	3	.	.	.	.	.	.	.	.	.	.	.	.	.	.	.	.	.	.	.	.	.	.	.	3	1	-2	.	.
358	9213590	AGP	40206	FMS	Rand	23151	Linn	Multi-purpose Smallholders	5	0	3	2	0	4	2	4	3	4	2	0	-1	.	.	.	.	.	.	.	.	.	.	.	.	.	.	.	.	.	.	.	.	.	.	.	4	0	4	0	0
359	9213691	AGP	40206	FMS	Rand	37106	Linn	Rural Residential	5	0	3	3	2	3	1	2	4	3	0	0	0	2	5	5	5	5	5	5	5	5	.	.	.	.	.	.	.	.	.	.	.	.	.	.	4	4	4	4	4
360	9213876	AGP	40205	FMS	Rand	38755	Linn	Rural Residential	4	1	.	.	.	4	4	4	4	6	2	0	1	55	5	55	55	45	55	45	55	75	.	55	55	55	55	45	55	48	45	45	45	45	45	55	4	4	4	1	4
361	9214463	JLM	40205	FMS	Rand	31234	Linn	Rural Residential	5	0	0	0	0	5	1	6	4	5	2	-2	0	55	0	0	55	100	0	55	100	35	.	0	0	0	0	0	0	.	.	.	.	.	.	.	5	5	5	-1	-1
362	9214468	AGP	40206	FMS	Rand	34666	Linn	Foresters	6	0	3	.	.	5	5	2	3	7	0	0	3	.	.	.	.	.	.	.	.	.	.	.	.	.	.	.	.	.	.	.	.	.	.	.	3	2	3	3	3
363	9214538	AGP	40206	FMS	Rand	23148	Linn	Rural Residential	4	0	2	2	2	5	2	2	5	5	3	-3	-2	85	5	25	5	5	5	5	5	5	5	5	5	5	5	5	5	5	5	5	5	5	5	5	5	5	5	5	5
[truncated: 38 more columns]

## Sheet: Financial Parameters
FINANCIAL PARAMETERS OF FUELS REDUCTION OPTIONS IN FOREST MANAGEMENT SURVEY
Project:	Cost Range/acre:	Revenue Range/acre:	Worst Case Math:	Worst Case/acre:	Best Case Math:	Best Case/acre:	Average:
mixed to oak woodland	500-2000	300-2500	300-2000 =	-1700	2500-500 =	2000	150
mixed to savanna	1500-5000	500-3000	500-5000 =	-4500	3000-1500 =	1500	-1500
dense young con to thinned young con	800-1500	1500-4500	1500-1500 =	0	4500-800 =	3700	1850
dense young con to oak woodland	1500-5000	1500-5500	5000-1500 =	3500	5500-1500 =	4000	3750
dense mature con to thinned mature con	2000-3000	2500-10500	3000-2500 =	500	10500-2000 =	8500	4500
dense mature con to savanna	1500-5000	4000-25000	5000-4000 =	1000	25000-1500 =	23500	12250
Project asked without explicit $$ data:
mixed to thinned young conifer	700-2800	200-1200	200-2800 =	-2600	1200-700 =	500	-1050

## Sheet: Column Codes and Metadata
Column Code							LMS Q #	FMS Q #	Description		Result
ID							-	-	Unique, ordered identification number		Number
SurveyID							-	-	Identification number from survey (there is occasional duplication from Excel's random number generator)		Number
EnteredBy							-	-	Name of person who entered the data		3 initials
DateEntered							-	-	Date the data was entered		Number of days past 01/01/1900
Survey							-	-	The survey the participant responded to		LMS, FMS
Sample							-	-	How the participant was selected		Random, Volunteer
P_Outlier							-	-	Possible Outlier: defined as parcel size greater than 5,000 acres		1=Yes, 0=No
JF							IDU Atts	IDU Atts	Join Field Number - link back to GIS study area coverages		Number
County							IDU Atts	IDU Atts	The study area from which the participant was selected		Lane, Linn
ImpValue							IDU Atts	IDU Atts	The class of improvement values of the parcel		Low, Medium, High
IMPV							IDU Atts	IDU Atts	What was the improvement value of the parcel selected		Dollars
Oak							IDU Atts	IDU Atts	Do the GIS land cover layers indicate there may be Oak on the property		Oak, NoOak
OA3							IDU Atts	IDU Atts	Average number of cells of Oak on parcel as recorded from three land cover GIS layers in the August 08 draft IDU coverage		Number
ParcelSize							IDU Atts	IDU Atts	What class of parcel size was the participant's parcel		Small, Medium, Large
GISAcres							IDU Atts	IDU Atts	What was the GIS measured size of the parcel		Number
Prop1							1	1	What is the estimated total acreage of "your property"?		Acres
Prop2							2	2	Approximately how many years have you been a property owner anywhere in area indicated on the map? (YEARS)		Years
Prop3							3	3	About how many properties do you own in western Oregon? (PARCELS)		Parcel/s
Prop4							4	4	Please check this circle if you live on "your property".		1 = yes, 0 = no
Prop5							5	5	If so, how many years?		Years
Prop6							6	6	If not, please check this circle if you live elsewhere in the Willamette Valley.		1 = yes, 0 = no
Prop7							7	7	If you live elsewhere in the Willamette Valley, how many years have you lived there?		Years
WV							Calculated	Calculated	Indicates whether the respondent is a Willamette Valley Resident; calculated from Prop4 and Prop6		1=Yes, 0=No
WV_Years							Calculated	Calculated	Number of years lived in the Willamette Valley; calculted from Prop5 and Prop7		Years
WV_LT10							Calculated	Calculated	Classifies respondent as to whether they have lived in the Willamette Valley for less than 10 years; calculated from WV_Years		1=Less than 10 years; 0=greater than 10 years; -1=lives outside WV
Prop8							8	8	Which of the following land types are found on "your property"? Check all that apply.
	Prop8a						8a	8a		Mostly Conifer Forests (e.g., Douglas fir)	1 = yes, 0 = no
	Prop8b						8b	8b		Mostly Deciduous Forests (e.g., Oak or Maple)	1 = yes, 0 = no
	Prop8c						8c	8c		Mixed Conifer and Deciduous Forest	1 = yes, 0 = no
	Prop8d						8d	8d		Riparian Forest (near creeks or rivers)	1 = yes, 0 = no
	Prop8e						8e	8e		Agricultural Crops/Christmas Trees	1 = yes, 0 = no
	Prop8f						8f	8f		Stocked Pasture or Grassland	1 = yes, 0 = no
	Prop8g						8g	8g		Unstocked Pasture or Grassland	1 = yes, 0 = no
	Prop8h						8h	8h		Vacant/Unused Open Land	1 = yes, 0 = no
	Prop8i						8i	8i		Native Prarie/Wet Meadow	1 = yes, 0 = no
	Prop8j						8j	8j		Wetlands	1 = yes, 0 = no
	Prop8k						8k	8k		Developed (Buildings)	1 = yes, 0 = no
	Prop8l						8l	8l		Other	1 = yes, 0 = no
Prop9							9	17	Which of the following are important goals for your property in the coming ten years? For each option please check one answer.
	Prop9a						9a	17a		A place to live	See LU Table 1 (Importance)
	Prop9b						9b	17b		A place to raise my family	See LU Table 1 (Importance)
	Prop9c						9c	17c		A place for my extended family to live	See LU Table 1 (Importance)
	Prop9d						9d	17d		Timber Production	See LU Table 1 (Importance)
	Prop9e						9e	17e		Agricultural Production	See LU Table 1 (Importance)
	Prop9f						9f	17f		Peace and Quiet	See LU Table 1 (Importance)
	Prop9g						9g	17g		Personal Enjoyment	See LU Table 1 (Importance)
	Prop9h						9h	17h		Improve Wildlife Habitat	See LU Table 1 (Importance)
	Prop9i						9i	17i		Manage Forest Health	See LU Table 1 (Importance)
	Prop9j						9j	17j		Reforestation of Cleared Land	See LU Table 1 (Importance)
	Prop9k						9k	17k		Raise Stock (e.g., Cows, Horses, Pigs, etc.)	See LU Table 1 (Importance)
	Prop9l						9l	17l		Residential Development	See LU Table 1 (Importance)
	Prop9m						9m	17m		M. Provide Income	See LU Table 1 (Importance)
	Prop9n						9n	17n		Maintain or Improve Scenic Beauty	See LU Table 1 (Importance)
	Prop9o						9o	17o		Conduct Ecological Restoration	See LU Table 1 (Importance)
	Prop9p						9p	17p		Land as a Financial Investment	See LU Table 1 (Importance)
	Prop9q						9q	17q		Reduce Fire Risks	See LU Table 1 (Importance)
	Prop9r						9r	17r		Others	See LU Table 1 (Importance)
	Prop9s						9s	17s		Others	See LU Table 1 (Importance)
Prop10							11	21	In the event of a fire do you have any of the following water sources that could be used for firefighting?
	Prop10a						11a	21a		An outdoor swimming pool	1 = yes, 0 = no
	Prop10b						11b	21b		A pond, lake, or stock tank	1 = yes, 0 = no
	Prop10c						11c	21c		A creek or river that flows through "your property" reliably in the summer	1 = yes, 0 = no
Prop11							16	22	Is "your property" in a rural fire protection district?		1 = yes, 0 = no, Don't Know = -99
WF1							10	18	Have you experienced any of the following effects from wildfire anywhere you have been? For each statement please check one answer.
	WF1a						10a	18a		Felt fear or anxiety?	See LU Table 2 (Wildfire Impacts)
	WF1b						10b	18b		A road closure due to wildfire?	See LU Table 2 (Wildfire Impacts)
	WF1c						10c	18c		Smoke or discomfort from wildfire?	See LU Table 2 (Wildfire Impacts)
	WF1d						10d	18d		Friends, family, or neighbors suffered wildfire damages?	See LU Table 2 (Wildfire Impacts)
	WF1e						10e	18e		Evacuated home, workplace, or property due to wildfire?	See LU Table 2 (Wildfire Impacts)
	WF1f						10f	18f		Been injured or suffered property damage?	See LU Table 2 (Wildfire Impacts)
WF2							12	19	What is your sense of the current risk of catastrophic wildfire in the southern Willamette Valley foothills?		See LU Table 3 (Wildfire Risk)
WF3							13	20	How big of a problem do you believe climate change may pose by increasing wildfire risk in the southern Willamette Valley foothills?
	WF3a						13a	20a		Climate is not changing and poses no threat to increase fire risks.	1 = yes, 0 = no
	WF3b						13b	20b		Climate change will likely only cause minor increases, if any, to fire risk	See LU Table 4 (Climate Change)
	WF3c						13c	20c		Climate change will likely cause a modest increase in the number and severity of fires	See LU Table 4 (Climate Change)
	WF3d						13d	20d		Climate change will likely cause a big problem due to many, severe wildfires	See LU Table 4 (Climate Change)
WF4							18	23	If a wildfire occurs on or near "your property" how vulnerable do you believe you would be?
	WF4a						18a	23a		My local fire department will protect me...	See LU Table 5 (Wildfire Vulnerability)
	WF4b						18b	23b		Wildfire is an indiscriminant act of nature...	See LU Table 5 (Wildfire Vulnerability)
	WF4c						18c	23c		Wildfire is an indiscriminant act of nature...	See LU Table 5 (Wildfire Vulnerability)
	WF4d						18d	23d		I will have a voice in helping my community...	See LU Table 5 (Wildfire Vulnerability)
	WF4e						18e	23e		I am not worried because I have prepared...	See LU Table 5 (Wildfire Vulnerability)
WF5							17	24	Please evaluate the following policy principles governing firefighting relations with landowners.
	WF5a						17a	24a		When a wildfire threatens my neighborhood...	See LU Table 5 (Wildfire Vulnerability)
	WF5b						17b	24b		I believe that it is a responsibility of friends and neighbors...	See LU Table 5 (Wildfire Vulnerability)
	WF5c						17c	24c		If wildfire threatens to burn across private land...	See LU Table 5 (Wildfire Vulnerability)
	WF5d						17d	24d		For the benefit and saftey of all involved...	See LU Table 5 (Wildfire Vulnerability)
DEC1							29	25	Whenever you make a major decision about changing the use or management of your property, how influential are others in your decision making?
	DEC1a						29a	25a		Family members	LU Table 11 (Management Influences)
	DEC1b						29b	25b		Co-owners	LU Table 11 (Management Influences)
	DEC1c						29c	25c		Neighbors' actions	LU Table 11 (Management Influences)
	DEC1d						29d	25d		Neighbors' opinions	LU Table 11 (Management Influences)
	DEC1e						29e	25e		Friends	LU Table 11 (Management Influences)
	DEC1f						29f	25f		Corporate offices	LU Table 11 (Management Influences)
	DEC1g						29g	25g		Legal council	LU Table 11 (Management Influences)
	DEC1h						29h	25h		Financial advisors	LU Table 11 (Management Influences)
	DEC1i						29i	25i		Forestry experts	LU Table 11 (Management Influences)
	DEC1j						29j	25j		Habitat experts	LU Table 11 (Management Influences)
	DEC1k						29k	25k		Ag. experts	LU Table 11 (Management Influences)
	DEC1l						29l	25l		Others1	LU Table 11 (Management Influences)
DEM1							31	9	What is your gender?		1 = male, 2 = female
DEM2							32	10	What is your age?		Age
DEM3							33	11	What is your occupation?		See LU Table 19 (Occupation)
DEM4							34	12	Is your property in an urban growth boundary?		1 = yes, 0 = no, Don't Know = -99
DEM5							35	13	What is the zip code of your primary residence?		Zip code
DEM6a							36a	14a	If you do not live in the Willamette Valley, please check here and skip to Question 37		1 = yes
DEM6b							36b	14b	If you moved to the Willamette Valley more than 10 years ago please check here, and skip to Question 37 (Data unreliable - see MNP)		1 = yes
DEM6c							36c	14c	If you moved to the WV in the last 10 years where did you move from? (Data unreliable - see MNP)		See LU Table 12 (Place of Origin)
DEM7							37	15	What is the highest level of education that you have completed?		See LU Table 13 (Education)
DEM8							38	16	Which of the following best describes your household's pre-tax annual income?		LU Table 14 (Income)
DEM9							30	38	Listed below are several opposing pairs of general statements about natural resource management and property rights.
	DEM9a						30a	38a		forests need to be actively to be healthy and productive…forests that are left alone without human intervention will grow by healthy natural processes	See LU Table 15 (Resource Management Politics)
	DEM9b						30b	38b		Natural resoure management should prioritize modifying the enviroment to meet important human needs for local communities…Natural resource management should prioritize taking care of vital and delicate natural processes to prevent big problems in the future	See LU Table 15 (Resource Management Politics)
	DEM9c						30c	38c		Property Owners should be allowed to make land use decisions without interference from government…Government land use regulations are important to maintaining productive farms, forests, and habitats	See LU Table 15 (Resource Management Politics)
DEM10							39	39		Generally, how do you think of yourself politically?	See LU Table 16 (Political Leanings)
Politics							Calculated	Calculated	Classification of political Ideology based on DEM10		Liberal, Conservative, Other
RiskAct1							14	-	Please indicate which of the following fireproofing steps you have taken or are planning to take to reduce wildfire risk to that home or structure?		See LU Table 6 (Fireproofing Intent)
	RiskAct1a						14a	-		I do not have a home or structure on "my property"	1 = yes, 0 = no
	RiskAct1b						14b	-		Create a 30 - 100 foot defensible space around your home with few trees and shrubs	See LU Table 6 (Fireproofing Intent)
	RiskAct1c						14c	-		Plant low growing, fire resistant plantss around your home	See LU Table 6 (Fireproofing Intent)
	RiskAct1d						14d	-		Put a fire resistant roof on your home	See LU Table 6 (Fireproofing Intent)
	RiskAct1e						14e	-		Remove dead branches from around your home's roof and chimney	See LU Table 6 (Fireproofing Intent)
	RiskAct1f						14f	-		Make your home easily identifiable and accessible from a main road	See LU Table 6 (Fireproofing Intent)
	RiskAct1g						14g	-		Improve driveways or access roads to accomodate fire trucks	See LU Table 6 (Fireproofing Intent)
	RiskAct1h						14h	-		Stack firewood and scrapwood piles at least 30 feet from any structure	See LU Table 6 (Fireproofing Intent)
	RiskAct1i						14i	-		Move propane and other fuel tanks at least 30 feet from any structure	See LU Table 6 (Fireproofing Intent)
RiskAct2							15	-	Please indicate which of the following management practices you have taken or are planning to take to reduce wildfire risk to the forests and woodlands on "your property"?
	RiskAct2a						15a	-		I do not have any forest or woodland on "my property"	1 = yes, 0 = no
	RiskAct2b						15b	-		Mow or graze forest grasses and other fine ground fuels to reduce risk	LU Table 7 (Wildfire Management Practices)
	RiskAct2c						15c	-		Mow or graze grasses and other fine fuels adjacent to forests	LU Table 7 (Wildfire Management Practices)
	RiskAct2d						15d	-		Prune low branches on trees away from the ground	LU Table 7 (Wildfire Management Practices)
	RiskAct2e						15e	-		Pile downed forest wood and burn in a controlled manner	LU Table 7 (Wildfire Management Practices)
	RiskAct2f						15f	-		Thin smaller trees from dense forest stands	LU Table 7 (Wildfire Management Practices)
	RiskAct2g						15g	-		Create fuel breaks on the edges or within your forest stands	LU Table 7 (Wildfire Management Practices)
	RiskAct2h						15h	-		Make sure trees on your propertyare away from all overhead utility lines	LU Table 7 (Wildfire Management Practices)
	RiskAct2i						15i	-		Convert your forests to more fire-resistant oak woodlands	LU Table 7 (Wildfire Management Practices)
LU1							19	-	Did you file a measure 37 claim?		1 = yes, 0 = no, I Prefer Not to Answer = -99
LU2							20	-	Do you qualify for a Measure 49 claim?		1 = yes, 0 = no, I Prefer Not to Answer = -99
LU3							21	-	Given what you now understand to be your property rights and freedoms under current zoning and Measure 49, how many new houses do you believe you now have the right to add to your property?		LU Table 8 (House Building Potential)
LU4							22	-	Under current regulations, what is the probability that you will add the following numbers of houses to your property in the next 10 years?
	LU4a						22a	-		I will not add any new houses to my property	(1-100)
	LU4b						22b	-		I would add 1 new house	(1-100)
	LU4c						22c	-		I would add 2 new houses	(1-100)
	LU4d						22d	-		I would add 3 - 5 new houses	(1-100)
	LU4e						22e	-		I would add 6 - 10 new houses	(1-100)
	LU4f						22f	-		I would add more than 10 new houses	(1-100)
LU5							23	-	Now imagine that land use regulations were relaxed so that you could add up to 2 houses per acres across your whole property, and that it became easier to get the necessary permits. Under these conditions what is the probability that you would add the following numbers of houses to your property in the next 10 years
	LU5a						23a	-		I will not add any new houses to my property	(1-100)
	LU5b						23b	-		I would add 1 new house	(1-100)
	LU5c						23c	-		I would add 2 new houses	(1-100)
	LU5d						23d	-		I would add 3 - 5 new houses	(1-100)
	LU5e						23e	-		I would add 6 - 10 new houses	(1-100)
	LU5f						23f	-		I would add more than 10 new houses	(1-100)
LU6							24	-	In the next 10 years what is the likelihood that you will make any of the following major changes in vegetation listed below on one or more significant patches anywhere on your property?
	LU6a						24a	-		Convert forest to open cropland, pasture, or vacant land	(1-100)
	LU6b						24b	-		Convert open cropland, pasture, or vacant land to forest	(1-100)
	LU6c						24c	-		Convert forest to Christmas tree farm	(1-100)
	LU6d						24d	-		Convert Christmas tree land to forest	(1-100)
	LU6e						24e	-		Convert Christmas tree land to open cropland, pasture, or vacant land	(1-100)
	LU6f						24f	-		Convert open cropland, pasture, or vacant land to Christmas tree farming	(1-100)
	LU6g						24g	-		Other1	(1-100)
	LU6h						24h	-		Other2	(1-100)
	LU6i						24i	-		Other3	(1-100)
LU7							25	-	In the next 10 years what is the likelihood that you will make any of the following managment changes listed below on one or more significant patches anywhere on your property?
	LU7a						25a	-		Thin forests to reduce hazardous wildfire fuels	(1-100)
	LU7b						25b	-		Thin forests to improve wildlife habitat quality	(1-100)
	LU7c						25c	-		Thin forests to improve its future commercial values	(1-100)
	LU7d						25d	-		Convert open cropland, pasture, or vacant land to native grasslands or prairie habitat at your own expense	(1-100)
	LU7e						25e	-		Convert open cropland, pasture, or vacant land to native grassland or prairie habitat if you were compensated for the expense any any lost income on the patch of land	(1-100)
	LU7f						25f	-		Convert open cropland, pasture, or vacant land to native grassland or prairie habitat if you were paid more per year than you currently earn from that land	(1-100)
	LU7g						25g	-		Convert forestland to native oak woodland or oak savanna habitat	(1-100)
	LU7h						25h	-		Other 1	(1-100)
LU8							27	-	Please imagine that increased human settlement or climate change soon caused water supply problems due to reductions in rainfall, snowpack, groundwater, or other mechanisms. Under this hypothetical condition, in the next 10 years what is the likelihood that you might respond with each of the following land management changes on at least one significan patch of your property.
	LU8a						27a	-		Covert irrigated cropland to dryland crops	(1-100)
	LU8b						27b	-		Convert irrigated cropland to low density housing	(1-100)
	LU8c						27c	-		Convert drought-stressed forest to open cropland, pasture, Christmas trees, or vacant land	(1-100)
	LU8d						27d	-		Convert cropland, pasture, Christmas trees, or vacant land to forest by planting oaks or other drought-tolerant trees	(1-100)
	LU8e						27e	-		Stop management of cropland, pasture, or Christmas trees to let nature take its course	(1-100)
	LU8f						27f	-		Make no changes to my land management because I have senior water rights and would not expect to be heavily impacted by water shortages	(1-100)
	LU8g						27g	-		Make no changes to my land management because I would expect the water shortages to be solved or only temporary	(1-100)
	LU8h						27h	-		Help form a rural water district to join with my neighbors to acquire more water supply and manage its use	(1-100)
LU9							28	-	How much more likely would you be to implement any of the following land conversions or land management activities if a significant number of your neighbors were also implementing those activities?
	LU9a						28a	-		Add new houses or subdivide your property?	LU Table 9 (Neighbor's Influence)
	LU9b						28b	-		Convert forest to agriculture?	LU Table 9 (Neighbor's Influence)
	LU9c						28c	-		Convert agriculture to forest?	LU Table 9 (Neighbor's Influence)
	LU9d						28d	-		Thin forests to reduce tree density and fuels?	LU Table 9 (Neighbor's Influence)
	LU9e						28e	-		Restore fire tolerant native prairie habitat?	LU Table 9 (Neighbor's Influence)
	LU9f						28f	-		Restore fire tolerant oak woodland or savanna?	LU Table 9 (Neighbor's Influence)
	LU9g						28g	-		Join a voluntary community forestry organization?	LU Table 9 (Neighbor's Influence)
CFO							26	-	Some communities have formed voluntary community forestry organization to help coordinate land management activities in ways that reduce the risks of wildfire. How likely would you be willing to join a voluntary community forestry organization in the following were true?
	CFOa						26a	-		The organization could assist with my costs...	LU Table 10 (volunteer Forestry Org.)
	CFOb						26b	-		The organization provided me with information...	LU Table 10 (volunteer Forestry Org.)
	CFOc						26c	-		The organization assisted me in planning wildfire...	LU Table 10 (volunteer Forestry Org.)
	CFOd						26d	-		The organization require me to attend meetings...	LU Table 10 (volunteer Forestry Org.)
	CFOe						26e	-		The organization could reduce any endangered species liability...	LU Table 10 (volunteer Forestry Org.)
	CFOf						26f	-		The organization provided training in fire-fighting...	LU Table 10 (volunteer Forestry Org.)
WF6							-	26	What is the likelihood that you will implement any of the following ground fuels reductions on a significant patch of your forest in the next 10 years?
	WF6a						-	26a		Cutting back brush and grasses manually, using tools like mowers, saws, axes and wood-grinders.	(1-100)
	WF6b						-	26b		Cutting back brush and grasses by hiring a big, powerful, mechanical brush mower on big tires/tracks	(1-100)
	WF6c						-	26c		Using prescribed fire, if you were in complete control of its planning an dexecution and received advice from experts about how to make it safe and effective.	(1-100)
	WF6d						-	26d		Using prescribed fire, if you allowed an outside team of experts or an agency to plan and execute the project safely, as they see fit.	(1-100)
	WF6e						-	26e		Using your preferred method from the above options, with financial assistance to cover all the costs.	(1-100)
ForMix6							-	30a	What is the likelihood that you will not significantly change any of the mixed deciduous and coniferous forest on your property over the next 10 years? The probability you will leave the forest alone.		(1-100)
ForMix7							-	30b	What is the likelihood that you will do a conventional timber harvest on at least 2 acres of mixed deciduous and conifer forest on your property during the next 10 years? If you had to bear the full cost of harvesting.		(1-100)
ForMixOW							-	30c	What is the likelihood that you will implement oak woodland restoration on a patch of mixed deciduous and conifer forest on your property during the next 10 years?
	ForMixOW1a						-	30c.a		If you had to bear the full cost or profit and risks to your rights...	(1-100)
	ForMixOW1b						-	30c.b		If you received enough financial assistance to break even, with risks to your rights...	(1-100)
	ForMixOW1c						-	30c.c		If you received assistance to guarantee profit of $1000 per acre with risks to your rights...	(1-100)
	ForMixOW1d						-	30c.d		If you had guaranteed rights...	(1-100)
	ForMixOW1e						-	30c.e		If your rights were guaranteed and you would earn $1000 profit per acre...	(1-100)
ForMixSav							-	30d.	What is the likelihood that you will implement oak savanna restoration on a patch of mixed deciduous and conifer forest on your property during the next 10 years?
	ForMixSav1a						-	30d.a		If you had to bear the full cost or profit and risks to your rights...	(1-100)
	ForMixSav1b						-	30d.b		If you received enough financial assistance to break even, with risks to your rights...	(1-100)
	ForMixSav1c						-	30d.c		If you received assistance to guarantee profit of $1000 per acre with risks to your rights...	(1-100)
	ForMixSav1d						-	30d.d		If you had guaranteed rights...	(1-100)
	ForMixSav1e						-	30d.e		If your rights were guaranteed and you would earn $1000 profit per acre...	(1-100)
ForMixSav2							-	30e	If you restored oak savanna, what is the likelihood that you would "go the extra mile" at your own expense to prepare the soil and plant native prairie grasses and wildflowers on at least 2 acres?		(1-100)
ForMixCon							-	30f	What is the likelihood that you will convert at least 2 acres of your mixed deciduous and conifer forest into a conifer forest by removing all the decidious trees during the nex 10 years?		(1-100)
ForDYCon6							-	33a	What is the likelihood that you will not significantly change any of the dense, young, mainly conifer forest on your property over the next 10 years? The probability you will leave the forest alone.		(1-100)
ForDYConT							-	33b	What is the likelihood that you will a significant patch of dense, young, mainly conifer forest on your property during the next 10 years?
	ForDYConT1a						-	33b.a		If you had to bear the full cost of implementing this thinning...	(1-100)
	ForDYConT1b						-	33b.b		If market conditions assured you to break even, with risks to your property	(1-100)
	ForDYConT1c						-	33b.c		If market conditions assured you a profit of at least $1,000 per acre, with risks to your rights	(1-100)
	ForDYConT1d						-	33b.d		If market conditions assured you a profit of at least $3,000 per acre, with risks to your rights.	(1-100)
ForDYConOW							-	33c.	What is the likelihood that you will implement oak savanna restoration on a patch of mixed deciduous and conifer forest on your property during the next 10 years?
	ForDYConOW1a						-	33c.a		If you had to bear the full cost or profit and risks to your rights...	(1-100)
	ForDYConOW1b						-	33c.b		If you received enough financial assistance to break even, with risks to your rights...	(1-100)
	ForDYConOW1c						-	33c.c		If you received assistance to guarantee profit of $1000 per acre with risks to your rights...	(1-100)
	ForDYConOW1d						-	33c.d		If you had guaranteed rights...	(1-100)
	ForDYConOW1e						-	33c.e		If your rights were guaranteed and you would earn $1000 profit per acre...	(1-100)
ForDYCon7							-	33d	What is the likelihood that you will implement a conventional timber harvest on at least 2 acres of dense, young, mainly-conifer forest on your property during the next 10 years? If you had to bear the full cost of implementing the timber harvest.		(1-100)
ForDMCon6							-	36a	What is the likelihood that you will not significantly change any of the dense, mature, mainly conifer-forest on your property over the next 10 years? The probability that you will leave the forest alone.		(1-100)
ForDMConT							-	36b	What is the likelihood that you will thin a significant patch of dense, young, mainly conifer forest on your property during the next 10 years?
	ForDMConT1a						-	36b.a		If you had to bear the full cost of implementing this thinning...	(1-100)
	ForDMConT1b						-	36b.b		If you received enough financial assistance to break even, with risks to your property rights	(1-100)
	ForDMConT1c						-	36b.c		If market conditions assured you a profit of at least $4,000 per acre, with risks to your rights	(1-100)
	ForDMConT1d						-	36b.d		If market conditions assured you a profit of at least $8,000 per acre, with risks to your rights.	(1-100)
ForDMConSav1							-	36c	What is the likelihood that you will implement oak savanna restoration on a patch of mixed deciduous and conifer forest on your property during the next 10 years?
	ForDMConSav1a						-	36c.a		If you had to bear the full cost or profit of implementing and maintaining it with risks to your rights	(1-100)
	ForDMConSav1b						-	36c.b		If you received enough financial assistance to break even, with risks to your rights...	(1-100)
	ForDMConSav1c						-	36c.c		If you received financial assistance to guarantee profit of $10,000 per acre with risks to your rights...	(1-100)
	ForDMConSav1d						-	36c.d		If you had a legal guarantee that the government would not take any of your property rights	(1-100)
	ForDMConSav1e						-	36c.e		If you were guaranteed to keep your property rights and earn a profit of $5,000 per acre	(1-100)
ForDMConSav2							-	36d	If you restored oak savanna, what is the likelihood that you would "go the extra mile" at your own expense to prepare the soil...		(1-100)
ForDMCon7							-	36e	What is the likelihood that you will do a conventional timber harvest on at least 2 acres of dense, mature, mainly-conifer forest on your property during the next 10 years?		(1-100)
Scenic Beauty Questions								-
	ForSav1						-	27a	How much scenic beauty do you see in this oak savanna open forest landscape?		See LU Table 16 (Scenic Beauty Scale)
	ForOW1						-	28a	How much scenic beauty do you see in this deciduous oak savanna woodland forest landscape?		See LU Table 16 (Scenic Beauty Scale)
	ForMix1						-	29a	How much scenic beauty do you see in this mixed deciduous and conifer forest landscape?		See LU Table 16 (Scenic Beauty Scale)
	ForTYCon1						-	31a	How much scenic beauty do you see in this thinned, young, mainly-conifer forest landscape?		See LU Table 16 (Scenic Beauty Scale)
	ForDYCon1						-	32a	How much scenic beauty do you see in this dense, young, mainly-conifer forest landscape?		See LU Table 16 (Scenic Beauty Scale)
	ForTMCon1						-	34a	How much scenic beauty do you see in this thinned, mature, mainly-conifer forest landscape?		See LU Table 16 (Scenic Beauty Scale)
	ForDMCon1						-	35a	How much scenic beauty do you see in this dense, mature, mainly-conifer forest landscape?		See LU Table 16 (Scenic Beauty Scale)
Wildfire Risk Questions								-
	ForSav2						-	27b	oak savanna: Please check the one circle that best matches your evaluation of this expert opinion		See LU Table 17 (Expert Value Assessment)
	ForOW2						-	28b	deciduous oak woodland forest : Please check the one circle that best matches your evaluation of this expert opinion		See LU Table 17 (Expert Value Assessment)
	ForMix2						-	29b	mixed deciduous and conifer forest: Please check the one circle that best matches your evaluation of this expert opinion		See LU Table 17 (Expert Value Assessment)
	ForTYCon2						-	31b	thinned, young, mainly-conifer forest: Please check the one circle that best matches your evaluation of this expert opinion		See LU Table 17 (Expert Value Assessment)
	ForDYCon2						-	32b	dense, young, mainly-conifer forest: Please check the one circle that best matches your evaluation of this expert opinion		See LU Table 17 (Expert Value Assessment)
	ForTMCon2						-	34b	thinned, mature, mainly-conifer forest: Please check the one circle that best matches your evaluation of this expert opinion		See LU Table 17 (Expert Value Assessment)
	ForDMCon2						-	35b	dense, mature, mainly-conifer forest: Please check the one circle that best matches your evaluation of this expert opinion		See LU Table 17 (Expert Value Assessment)
Habitat Value Questions								-
	ForSav3						-	27c	oak savanna: Please check the one circle that best matches your evaluation of this expert opinion		See LU Table 17 (Expert Value Assessment)
	ForOW3						-	28c	deciduous oak woodland forest : Please check the one circle that best matches your evaluation of this expert opinion		See LU Table 17 (Expert Value Assessment)
	ForMix3						-	29c	mixed deciduous and conifer forest: Please check the one circle that best matches your evaluation of this expert opinion		See LU Table 17 (Expert Value Assessment)
	ForTYCon3						-	31c	thinned, young, mainly-conifer forest: Please check the one circle that best matches your evaluation of this expert opinion		See LU Table 17 (Expert Value Assessment)
	ForDYCon3						-	32c	dense, young, mainly-conifer forest: Please check the one circle that best matches your evaluation of this expert opinion		See LU Table 17 (Expert Value Assessment)
	ForTMCon3						-	34c	thinned, mature, mainly-conifer forest: Please check the one circle that best matches your evaluation of this expert opinion		See LU Table 17 (Expert Value Assessment)
	ForDMCon3						-	35c	dense, mature, mainly-conifer forest: Please check the one circle that best matches your evaluation of this expert opinion		See LU Table 17 (Expert Value Assessment)
Property Risks Questions								-
	ForSav4						-	27d	oak savanna: Please check the one circle that best matches your evaluation of this expert opinion		See LU Table 17 (Expert Value Assessment)
	ForOW4						-	28d	deciduous oak savanna woodland forest : Please check the one circle that best matches your evaluation of this expert opinion		See LU Table 17 (Expert Value Assessment)
	ForMix4						-	29d	mixed deciduous and conifer forest: Please check the one circle that best matches your evaluation of this expert opinion		See LU Table 17 (Expert Value Assessment)
	ForTYCon4						-	31d	thinned, young, mainly-conifer forest: Please check the one circle that best matches your evaluation of this expert opinion		See LU Table 17 (Expert Value Assessment)
	ForDYCon4						-	32d	dense, young, mainly-conifer forest: Please check the one circle that best matches your evaluation of this expert opinion		See LU Table 17 (Expert Value Assessment)
	ForTMCon4						-	34d	thinned, mature, mainly-conifer forest: Please check the one circle that best matches your evaluation of this expert opinion		See LU Table 17 (Expert Value Assessment)
	ForDMCon4						-	35d	dense, mature, mainly-conifer forest: Please check the one circle that best matches your evaluation of this expert opinion		See LU Table 17 (Expert Value Assessment)
Forest Acreage Questions								-
	ForSav5						-	27e	oak savanna: Approximately how much of your property do you think is a lot like this forest type?		See LU Table 18 (Amount of forest on property in acres)
	ForOW5						-	28e	deciduous oak savanna woodland forest: Approximately how much of your property do you think is a lot like this forest type?		See LU Table 18 (Amount of forest on property in acres)
	ForMix5						-	29e	mixed deciduous and conifer forest: Approximately how much of your property do you think is a lot like this forest type?		See LU Table 18 (Amount of forest on property in acres)
	ForTYCon5						-	31e	thinned, young, mainly-conifer forest: Approximately how much of your property do you think is a lot like this forest type?		See LU Table 18 (Amount of forest on property in acres)
	ForDYCon5						-	32e	dense, young, mainly-conifer forest: Approximately how much of your property do you think is a lot like this forest type?		See LU Table 18 (Amount of forest on property in acres)
	ForTMCon5						-	34e	thinned, mature, mainly-conifer forest: Approximately how much of your property do you think is a lot like this forest type?		See LU Table 18 (Amount of forest on property in acres)
	ForDMCon5						-	35e	dense, mature, mainly-conifer forest: Approximately how much of your property do you think is a lot like this forest type?		See LU Table 18 (Amount of forest on property in acres)
Important Consideration Questions
	DEC2a						-	37a	Wildfire Risk: As you answered the questions above about forest changes you might make or not, how important were the following considerations?		See LU Table 1 (Importance)
	DEC2b						-	37b	Wildlife Habitat: As you answered the questions above about forest changes you might make or not, how important were the following considerations?		See LU Table 1 (Importance)
	DEC2c						-	37c	Scenic Beauty: As you answered the questions above about forest changes you might make or not, how important were the following considerations?		See LU Table 1 (Importance)
	DEC2d						-	37d	Property Rights: As you answered the questions above about forest changes you might make or not, how important were the following considerations?		See LU Table 1 (Importance)
	DEC2e						-	37e	Financial Costs: As you answered the questions above about forest changes you might make or not, how important were the following considerations?		See LU Table 1 (Importance)
	DEC2f						-	37f	Critical Financial Needs (i.e., health care, tuition): As you answered the questions above about forest changes you might make or not, how important were the following considerations?		See LU Table 1 (Importance)
	DEC2g						-	37g	Leaving the forest as nature intened: As you answered the questions above about forest changes you might make or not, how important were the following considerations?		See LU Table 1 (Importance)
	DEC2h						-	37h	Avoiding the hassle: As you answered the questions above about forest changes you might make or not, how important were the following considerations?		See LU Table 1 (Importance)
	DEC2i						-	37i	Short-term financial returns: As you answered the questions above about forest changes you might make or not, how important were the following considerations?		See LU Table 1 (Importance)
	DEC2j						-	37j	Long-term forest investment values: As you answered the questions above about forest changes you might make or not, how important were the following considerations?		See LU Table 1 (Importance)

## Sheet: Lookup Tables
LU Table 1 (Importance)	Code		Rob Table 1 Risks and Habitat Value As Provided
Not Important	1		Very High	3
Somewhat Important	2		High	2
Important	3		Moderately High	1
Very Important	4		Moderate	0
Non-response	.		Moderately Low	-1
			Low	-2
LU Table 2 (Wildfire Impacts)			Very Low	-3
No	1
More than 5 Years Ago	2
1 - 5 Years Ago	3
Within 1 year	4
LU Table 3 (Wildfire Risk)
Extremely High	7
High	6
Moderately High	5
Average	4
Moderatelty Low	3
Low	2
Extremely Low	1
LU Table 4 (Climate Change)
Today	3
Within 10 - 20 Years	2
Within 50 Years	1
I Don't Know	0
LU Table 5 (wildfire Vulnerability)
Very Strongly Disagree	1
Strongly Dissagree	2
Somewhat Disagree	3
Neither Agree nor Disagree	4
Somewhat Agree	5
Strongly Agree	6
Very Strongly Agree	7
LU Table 6 (Fireproofing Intent)
Already Done	3
Planning to do This Year	2
No Plans to Do	1
LU Table 7 (Wildfire Management Practices)
Already Done	4
Planning to do This Year	3
Planning for the Future	2
No Plans to Do	1
LU Table 8 (House Building Potential)
None	0
1	1
2	2
3-5	3
6-10	4
More than 10	5
I don't know	-99
LU Table 9 (Neighbor's Influence)
Not at All More Likely	0
I Don't Know	1
Somewhat Likely	2
Much More Likely	3
LU Table 10 (volunteer Forestry Org.)
Extremely Likely	7
Very Likely	6
Somewhat Likely	5
Neither Agree nor Disagree	4
Somewhat Unlikely	3
Very Unlikely	2
Extremely Unlikely	1
LU Table 11 (Management Influences)
Not Influential	1
Somewhat Influential	2
Influential	3
Very Influential	4
LU Table 12 (Place of Origin)
Elsewhere in Western Oregon	1
Elsewhere in Central or Eastern Oregon	2
Western Washington	3
Eastern Washington	4
California	5
Idaho	6
Other1	7
LU Table 13 (Education)
Less than a high school degree	1
High school degree or GED	2
Some college	3
2 year college degree	4
4 year college degree	5
Advanced degree (e.g., Masters, JD, MD, PhD)	6
LU Table 14 (Income)
Less than $15K	1
$15K - $25K	2
$25K - $35K	3
$35K - $50K	4
$50K - $75K	5
$75K - $100K	6
$100K - $150K	7
Greater than $150K	8
LU Table 15 (Resource Management Politics)
Left 3	3
Left 2	2
Left 1	1
Neutral	0
Right 1	-1
Right 2	-2
Right 3	-3
LU Table 16 (Political Leanings)
Very Liberal	-3
Liberal	-2
Moderately Liberal	-1
Neutral	0
Moderately Conservative	1
Conservative	2
Very Conservative	3
Hard To Say	4
Other1	5
LU Table 16 (Scenic Beauty Scale)
Very ugly	-5
Quite ugly	-4
Fairly ugly	-3
A bit ugly	-2
Slightly ugly	-1
Neutral or don't know	0
slight scenic beauty	1
A bit of scenic beauty	2
Fair scenic beauty	3
High scenic beauty	4
Very high scenic beauty	5
LU Table 17 (Expert Value Assessment)			Signs have to be reversed to adjust presented ratings.
Overstates	1
About right	0
Understates	-1
I don't know	-99
LU Table 18 (Amount of forest on property in acres)
None	0
1-10 acres	1
10-20 acres	2
20-50 acres	3
50-100 acres	4
More than 100 acres	5
I have some but don't know how much	-99
LU Table 19 (Occupation)
Employed	1
? Unemployed	2
Homemaker	3
? Student	4
Retired	5
